# Supplementary material
Source: PubMed Central journal article supplement (PMC5053883)
Supplement: NIHMS808830-supplement-1.pdf [file NIHMS808830-supplement-1.pdf]

**Supplementary Table 1. Effects of *Chaer* knockout on heart function.** WT, wildtype; KO, knockout; HR, heart rate; IVSs,d, ystolic and diastolic interventricular septum; LVDs,d, systolic and diastolic left ventricular dimension; LVPWs,d, left vetricular posterior wall thickness; EF, ejection fraction; FS, fraction shortening; Data were mean  $\pm$  s.e.m. Sample numbers were labeled after each group item. \* $P < 0.05$ , \*\*\* $P < 0.001$  versus WT; # $P < 0.05$ , ## $P < 0.01$ , ### $P < 0.001$  versus corresponding Sham groups (Students'  $t$  test).

|                   | Sham            |                 | TAC             |     |                 |         |
|-------------------|-----------------|-----------------|-----------------|-----|-----------------|---------|
|                   | WT (8)          | KO (6)          | WT (10)         |     | KO (7)          |         |
| Body weight (g)   | 26.4 $\pm$ 0.3  | 26.4 $\pm$ 0.4  | 27.0 $\pm$ 0.3  |     | 26.9 $\pm$ 0.3  |         |
| Heart weight (mg) | 109.1 $\pm$ 2.1 | 111.2 $\pm$ 1.4 | 158.2 $\pm$ 1.5 | ### | 134.6 $\pm$ 1.4 | ### *** |
| Lung weight (mg)  | 130.4 $\pm$ 2.8 | 131.7 $\pm$ 2.1 | 162.2 $\pm$ 1.6 | ### | 144.9 $\pm$ 1.6 | ### *** |
| HR (bpm)          | 475.5 $\pm$ 5.9 | 479.7 $\pm$ 7.2 | 486.5 $\pm$ 6.6 |     | 477.9 $\pm$ 7.4 |         |
| IVSd (mm)         | 0.65 $\pm$ 0.01 | 0.66 $\pm$ 0.01 | 0.73 $\pm$ 0.01 | ### | 0.71 $\pm$ 0.01 |         |
| LVDd (mm)         | 3.75 $\pm$ 0.04 | 3.81 $\pm$ 0.03 | 4.11 $\pm$ 0.03 | ### | 3.89 $\pm$ 0.03 | # ***   |
| LVPWd (mm)        | 0.64 $\pm$ 0.01 | 0.65 $\pm$ 0.01 | 0.74 $\pm$ 0.01 | ### | 0.69 $\pm$ 0.01 | ## *    |
| IVSs (mm)         | 1.03 $\pm$ 0.01 | 1.01 $\pm$ 0.01 | 1.15 $\pm$ 0.02 | ### | 1.08 $\pm$ 0.01 | ## ***  |
| LVDs (mm)         | 1.98 $\pm$ 0.03 | 2.02 $\pm$ 0.02 | 2.64 $\pm$ 0.03 | ### | 2.17 $\pm$ 0.01 | ### *** |
| LVPWs (mm)        | 1.01 $\pm$ 0.01 | 1.04 $\pm$ 0.01 | 1.15 $\pm$ 0.02 | ### | 1.09 $\pm$ 0.02 | # ***   |
| EF (%)            | 80.6 $\pm$ 1.3  | 80.8 $\pm$ 1.1  | 71.2 $\pm$ 0.6  | ### | 77.3 $\pm$ 0.6  | # ***   |
| FS (%)            | 47.4 $\pm$ 0.6  | 47.0 $\pm$ 0.5  | 35.8 $\pm$ 0.6  | ### | 44.0 $\pm$ 0.5  | ## ***  |

**Supplementary Table 2. List of genes oppositely affected by PE and Chaer deficiency.**  
 Values are fold change (> 1.5 folds) in log<sub>2</sub> scale. Highlighted are the genes reported to be related to cardiomyopathy.

| Gene ID  | siChaer-siNeg | siChaer PE-siChaer |
|----------|---------------|--------------------|
| PLA2G7   | 0.902427      | -1.47485           |
| NRTN     | 0.853064      | -1.27416           |
| OSGIN1   | 0.826706      | -1.25789           |
| H1FX     | 0.595154      | -1.11182           |
| GJA5     | 1.010547      | -1.11063           |
| RIL      | 0.947315      | -1.09966           |
| RCOR2L1  | 0.740647      | -1.04932           |
| NTN1     | 0.640203      | -1.02148           |
| PPP1R35  | 0.679942      | -0.96964           |
| SLC25A10 | 0.660916      | -0.91796           |
| NNAT     | 0.597051      | -0.91062           |
| RPL39    | 0.742797      | -0.85096           |
| HADH     | 0.616153      | -0.84224           |
| CDC20    | 1.172966      | -0.8403            |
| KIF20A   | 1.059816      | -0.80736           |
| NUSAP1   | 0.800234      | -0.76332           |
| TESC     | 1.040555      | -0.76324           |
| FAM102A  | 0.774076      | -0.74836           |
| ASF1B    | 0.775737      | -0.7482            |
| CDKN2C   | 1.03606       | -0.7439            |
| PLK1     | 1.093322      | -0.74111           |
| TEAD2    | 0.644916      | -0.73905           |
| MRI1     | 0.700758      | -0.7262            |
| HAUS4    | 0.676757      | -0.72576           |
| GMEB1    | 0.62528       | -0.7188            |
| TRIB1    | 0.708525      | -0.7152            |
| RPL38    | 0.604318      | -0.71396           |
| GSTM1    | 0.941065      | -0.70755           |
| RRM2     | 1.106673      | -0.70729           |
| SPC24    | 0.70323       | -0.70684           |
| MGMT     | 0.894608      | -0.70526           |
| HINT2    | 0.641423      | -0.70117           |
| FAM57B   | 0.958901      | -0.68031           |
| GTSE1    | 0.846868      | -0.67046           |
| RPS29    | 0.589362      | -0.67007           |
| RAE1     | 0.803523      | -0.65785           |
| KCNJ12   | 0.859557      | -0.6548            |
| MELK     | 0.624382      | -0.65403           |

---

|               |                 |                 |
|---------------|-----------------|-----------------|
| PALM          | 0.709485        | -0.65287        |
| PTOV1         | 0.737124        | -0.64689        |
| TCEAL7        | 0.909581        | -0.64196        |
| DAPK1         | 0.875446        | -0.6349         |
| CDCA3         | 1.173644        | -0.62509        |
| <b>IQGAP3</b> | <b>0.771085</b> | <b>-0.62395</b> |
| INO80B        | 0.773002        | -0.6218         |
| CKAP2         | 0.686529        | -0.62008        |
| TROAP         | 0.783586        | -0.61694        |
| <b>AKAP1</b>  | <b>0.5875</b>   | <b>-0.61553</b> |
| <b>PTTG1</b>  | <b>1.165298</b> | <b>-0.61481</b> |
| KIF18B        | 0.879716        | -0.60351        |
| FAM100B       | 0.814713        | -0.59648        |
| <b>LYRM4</b>  | <b>0.706861</b> | <b>-0.59623</b> |
| PHLDB1        | 0.664525        | -0.59437        |
| <b>FOXM1</b>  | <b>0.946475</b> | <b>-0.5912</b>  |
| PALD1         | 0.703006        | -0.586          |
| <b>CCL20</b>  | <b>-1.35475</b> | <b>2.436636</b> |
| <b>KIF5B</b>  | <b>-0.94106</b> | <b>2.378966</b> |
| IFIT1LB       | -1.71041        | 2.008517        |
| <b>SEMA3C</b> | <b>-0.81381</b> | <b>1.774554</b> |
| <b>UTRN</b>   | <b>-0.80677</b> | <b>1.606805</b> |
| <b>ENO3</b>   | <b>-0.83967</b> | <b>1.53494</b>  |
| SNTB1         | -0.68555        | 1.495425        |
| <b>BCL2</b>   | <b>-0.61098</b> | <b>1.34939</b>  |
| <b>RXFP1</b>  | <b>-0.63707</b> | <b>1.316754</b> |
| <b>ACSL4</b>  | <b>-0.6021</b>  | <b>1.307842</b> |
| B3GALT2       | -0.61564        | 1.263892        |
| RIF1          | -0.69967        | 1.105045        |
| <b>RGS2</b>   | <b>-0.71724</b> | <b>1.100427</b> |
| PRRG4         | -0.95495        | 1.092152        |
| ATP13A3       | -0.66171        | 1.082246        |
| NFKBIZ        | -0.6688         | 1.081044        |
| <b>STC1</b>   | <b>-0.8586</b>  | <b>1.064101</b> |
| CAPN12        | -0.58912        | 1.052798        |
| <b>NEBL</b>   | <b>-0.90671</b> | <b>0.978596</b> |
| TSPAN2        | -0.85819        | 0.924806        |
| <b>PRKG1</b>  | <b>-0.82525</b> | <b>0.906017</b> |
| <b>KRAS</b>   | <b>-0.7776</b>  | <b>0.898436</b> |
| MIR761        | -0.69176        | 0.875956        |
| <b>HOMER1</b> | <b>-0.7917</b>  | <b>0.873153</b> |
| FAM174B       | -0.64802        | 0.865487        |
| CCDC88A       | -0.91491        | 0.850827        |

---

---

|                |                 |                 |
|----------------|-----------------|-----------------|
| HLTF           | -0.7316         | 0.848301        |
| DCUN1D1        | -0.9275         | 0.843988        |
| <b>ROCK1</b>   | <b>-0.81605</b> | <b>0.834311</b> |
| C1GALT1        | -0.91229        | 0.828817        |
| ARFGEF1        | -0.86806        | 0.825254        |
| RGS7BP         | -0.62727        | 0.785792        |
| ATRX           | -0.94468        | 0.784108        |
| <b>SGCD</b>    | <b>-0.63839</b> | <b>0.773244</b> |
| PANK3          | -0.60505        | 0.771385        |
| ASCC3          | -0.88859        | 0.74602         |
| <b>EEA1</b>    | <b>-0.66632</b> | <b>0.74278</b>  |
| YES1           | -0.90094        | 0.73757         |
| TMEM47         | -0.83169        | 0.733422        |
| <b>RASA1</b>   | <b>-1.14443</b> | <b>0.728101</b> |
| PPM1K          | -1.01437        | 0.714557        |
| PICALM         | -0.62073        | 0.712595        |
| TMED5          | -0.76787        | 0.710244        |
| SETD7          | -1.20941        | 0.7009          |
| MYO9A          | -0.9248         | 0.700796        |
| <b>TRPM7</b>   | <b>-0.80302</b> | <b>0.695232</b> |
| <b>TGFBR1</b>  | <b>-0.69314</b> | <b>0.694994</b> |
| TROVE2         | -1.29791        | 0.685457        |
| HIST2H4        | -1.19967        | 0.681722        |
| <b>TRDN</b>    | <b>-0.84643</b> | <b>0.677743</b> |
| ACBD5          | -0.8883         | 0.675817        |
| CD2AP          | -0.74938        | 0.673106        |
| HTATSF1        | -0.75704        | 0.662329        |
| LMBRD2         | -0.64633        | 0.65909         |
| HNRPH1         | -1.01218        | 0.658643        |
| SPCS3          | -0.65497        | 0.658064        |
| TAOK1          | -1.33803        | 0.650267        |
| UPRT           | -0.71241        | 0.648604        |
| <b>GADD45A</b> | <b>-0.59812</b> | <b>0.647708</b> |
| ABCB7          | -0.68236        | 0.646996        |
| FAM198B        | -0.62271        | 0.646304        |
| ESF1           | -0.85132        | 0.644565        |
| <b>MSRA</b>    | <b>-0.62384</b> | <b>0.64304</b>  |
| SNRPF          | -0.70603        | 0.642973        |
| <b>DNM1L</b>   | <b>-0.62562</b> | <b>0.642736</b> |
| RC3H2          | -0.64278        | 0.641938        |
| OXCT1          | -0.64493        | 0.634186        |
| IFT74          | -0.78369        | 0.633527        |
| 2310002L09RIK  | -1.28327        | 0.632601        |

---

---

|                 |                 |                 |
|-----------------|-----------------|-----------------|
| ZDHHC21         | -0.736          | 0.622869        |
| PRPF39          | -0.84193        | 0.622213        |
| D14ABB1E        | -0.75236        | 0.620744        |
| EDEM3           | -0.80372        | 0.619399        |
| <b>HSP90AA1</b> | <b>-0.66241</b> | <b>0.617907</b> |
| <b>KRIT1</b>    | <b>-0.63832</b> | <b>0.614043</b> |
| DMXL1           | -1.18488        | 0.612833        |
| MAN1A2          | -0.72617        | 0.607662        |
| CDC42BPA        | -0.61032        | 0.605495        |
| SMEK2           | -0.96949        | 0.602348        |
| COPS2           | -0.83891        | 0.600305        |
| MPP5            | -0.6246         | 0.596393        |
| NIPBL           | -0.91084        | 0.595067        |
| <b>TECRL</b>    | <b>-1.09286</b> | <b>0.595032</b> |
| <b>PPP3CA</b>   | <b>-0.9464</b>  | <b>0.59363</b>  |
| RANBP2          | -0.75785        | 0.590086        |
| <b>PROS1</b>    | <b>-0.64417</b> | <b>0.589844</b> |

---

**Supplementary Table 3. Gene ontology analysis for negatively correlated genes between PE induction and *Chaer* deficiency in NRVM.**

| <b>Functional Clusters</b> | <b>Count</b> | <b>Percentage</b> | <b><i>P</i>-Value</b> | <b>Benjamini</b> |
|----------------------------|--------------|-------------------|-----------------------|------------------|
| mitotic cell cycle         | 12           | 8.9               | 8.30E-07              | 7.70E-04         |
| cell cycle                 | 16           | 11.9              | 1.60E-05              | 4.80E-03         |
| organelle fission          | 9            | 6.7               | 6.00E-05              | 9.20E-03         |
| nuclear division           | 9            | 6.7               | 4.70E-05              | 1.10E-02         |
| ribonucleotide binding     | 25           | 18.5              | 3.90E-04              | 1.30E-02         |
| ATP binding                | 23           | 17                | 1.10E-04              | 2.30E-02         |
| cytoskeleton organization  | 10           | 7.4               | 3.90E-04              | 4.40E-02         |

**Supplementary Table 4. Top down-regulated genes show a property being clustered in conserved transcriptional loci.** 27 out of top 50 down-regulated genes after *Chaer* KD are clustered in 11 genomic transcription loci while none of top 50 up-regulated genes can be clustered to any co-regulated genomic loci.

| Clusters | Genes                        | Regulation | Mouse | Rat   | Human |
|----------|------------------------------|------------|-------|-------|-------|
| 1        | H19, Igf2                    | Down       | chr7  | chr1  | chr11 |
| 2        | Gbp1, Gbp2, Gbp5, Gbp7       | Down       | chr3  | chr2  | chr1  |
| 3        | Isg15, Agrn                  | Down       | chr4  | chr5  | chr1  |
| 4        | Oas11, Oasl2                 | Down       | chr5  | chr12 | chr12 |
| 5        | Cxcl3, Cxcl5, Pf4,           | Down       | chr5  | chr14 | chr4  |
| 6        | Ccl2, Ccl7, Ccl12            | Down       | chr11 | chr10 | chr17 |
| 7        | ssh2, coro6, Taok1           | Down       | chr11 | chr10 | chr17 |
| 8        | Rsad2, Cmpk2                 | Down       | chr12 | chr6  | chr2  |
| 9        | Mx1, Mx2, Bace2              | Down       | chr16 | chr11 | chr21 |
| 10       | Rtp4, Masp1                  | Down       | chr16 | chr11 | chr3  |
| 11       | Ifit1, Ifit2, Ifit3, Ifit11b | Down       | chr19 | chr1  | chr10 |

**Supplementary Table 5. Primer list.**

| Genes        | Species       | Purpose          | Sense (5'→3')                          | Anti-sense (5'→3')                  |
|--------------|---------------|------------------|----------------------------------------|-------------------------------------|
| Chaer        | mouse         | qPCR             | TCCAATGAGGGAAGCGAAGC                   | GTCCGATGCCAGTTCCAGTT                |
|              | rat           | qPCR             | GTAGACTGCTTGAGGGAACAG                  | AGGAGGTGTAGGATCTGCAGA               |
|              | mouse         | cloning          | AATGCGGCCGCCTCACGGAGT<br>GCAGACTC      | AGGAAGCTTCCACAGTAGGCC<br>TGAGAGCT   |
|              | human         | cloning          | GGAAACACTTCAGCTATGACA                  | GCCAGGCTCTTCGGGGCTT                 |
|              |               | qPCR<br>(pair 1) | GAGCCAAAAACCAACAAGGA                   | GGCCCAGCTACTGTGCTAAC                |
|              |               | qPCR<br>(pair 2) | GTGAAGGAACAGGGTGTGCT                   | GCCCAGCTACTGTGCTAACC                |
| Chaer-66mer  | mouse         | cloning          | TTTGGATCCTCACGGAGTGCAG<br>ACTCGGT      | AGAGATATCCATCGGACACGT<br>GTTACCA    |
| Hotair       | mouse         | qPCR             | CTTTCAAGGCCTGTCTCCTG                   | CAACATTCTAGCTGCACGGA                |
|              | rat           | qPCR             | CATGACCAGCGATCTGACCAC                  | CAGTGCACCTCACATCTGCAGA              |
|              | mouse         | cloning          | CAGGATATCACAGTGGAAAGGA<br>AGGAAAGAATCA | CAGCTCGAGGCATTTGTAAGC<br>AAGGCTTTCA |
| Hotair-89mer | mouse         | cloning          | TTTGGATCCATACTAGCTTTTC<br>CACACCCA     | TTTGGATCCATACTAGCTTTTC<br>CACACCCA  |
| Hottip       | mouse         | qPCR             | GCACCATTCACTCACACTCCTG                 | CAAAACGGAATGCAACAGTG<br>GA          |
| Fendrr       | mouse/<br>rat | qPCR             | GTGAGACCCGAGAGGCTGGA                   | GAAGATGGTCCAGCGCCCACT               |
| H19          | mouse         | qPCR             | CCTCAGACGGAGATGGACGA                   | CCCCCTTTTGAATTTGCACTA               |
|              | rat           | qPCR             | GATGACAGGTGTGGTCAACG                   | CAGACATGAGCTGGGTAGCA                |
|              | rat           | AciI             | CCATACTGTGCCTCTGGTTG                   | TGGGTGCTCCTCACTGTCAC                |
|              | rat           | AciI/ChI<br>P    | CTATATGTTCTCGACCTCAA                   | CCAGCGCACGTTTCGCCTCAC               |
|              | rat           | AciI             | GTCCTTGTACTGATTGGTTG                   | CCTCCCACACCCGGTGCTTC                |
| Anf          | mouse         | qPCR             | GTACAGTGCGGTGTCCAACA                   | TCTCCTCCAGGTGGTCTAGCA               |
|              | rat           | qPCR             | ATACAGTGCGGTGTCCAACA                   | AGCCCTCAGTTTGCTTTTCA                |
|              | human         | qPCR             | TCTGCCCTCCTAAAAAGCAA                   | ATCACAACTCCATGGCAACA                |
|              | mouse         | ChIP             | ATCGCTTTATCGCTGCAAGT                   | TCAGCTTTTGTCCGTCCTG                 |
|              | rat           | ChIP             | GAGGCCAATGAATCAGGTGT                   | TGTCAGGGGCTCCAAATAAG                |
| Myh7         | mouse         | qPCR             | GTACAGCTCTTCTACAGGCCT                  | GGCACAAAAACATCTTTCTTG<br>AGG        |
|              | rat           | qPCR             | GCTCCTAAGTAATCTGTTTGC                  | AAGTGAGGGTGCCTGGAGCG                |
|              | human         | qPCR             | TGTGCTCGCCAGAATGGAGTA                  | CAGCGCTCCTCAGCATCTGCC               |
|              | mouse         | ChIP             | ACTCAGACCCTGAACATGCC                   | ACCCAGTCCCTAGCCAGATT                |



|                  |           |         |                                   |                                          |
|------------------|-----------|---------|-----------------------------------|------------------------------------------|
|                  | rat       | ChIP    | CGTGGCTCAAAGAAAGGAAG              | TCAGCACGTGGAAGAGTGAC                     |
| Acta1            | mouse/rat | qPCR    | GCTGTGTTCCCATCCATCGT              | GCAGGCACGTTGAAGGTCTC                     |
|                  | human     | qPCR    | TGCCCATTTATGAGGGCTAC              | GCCATCTCGTTCTCGAAGTC                     |
|                  | mouse     | ChIP    | AGCAGTCTGCAAAGCAGTGA              | GACCAGGCCGTATATGGAGA                     |
| Gata4            | rat       | ChIP    | CTCCCCTCACTACCTCCTCC              | AAGCTCCCCAATCCAGAGAT                     |
|                  | mouse     | qPCR    | TCTCACTATGGGCACAGCAG              | GCGATGTCTGAGTGACAGGA                     |
|                  | rat       | qPCR    | TCTCACTATGGGCACAGCAG              | CGAGCAGGAATTTGAAGAGG                     |
| Hopx             | rat       | ChIP    | CTTCTCCTCTACCAGCCACG              | TCTCTCGGGGAATGAAAGTG                     |
|                  | rat       | qPCR    | AACAAGGTCAACAAGCACCC              | CCACAGGAGGAGAAAGCAAG                     |
|                  | mouse/rat | qPCR    | TCCTGCACCACCAACTGCTTAG            | GATGACCTTGCCACAGCCTTG                    |
| Gapdh            | human     | qPCR    | GAGTCAACGGATTTGGTCGT              | TTGATTTTGGAGGGATCTCG                     |
|                  | mouse     | ChIP    | GAATGCCTTTTCTCCCTTCC              | GAGCCAGGGACTCTCCTTTT                     |
|                  | rat       | ChIP    | TTTCTGGTTTCTGGGTCTG               | ATGAGGGTTCCAGGATAGG                      |
| U6               | mouse     | qPCR    | GTGCTCGCTTCGGCAGCA                | GGAACGCTTCACGAATTTGC                     |
| Rn18S            | mouse     | qPCR    | TATGGTTCCTTTGGTCGCTCG             | GATCTGATAAATGCACGCATCC                   |
| Actb             | mouse/rat | qPCR    | GGAGCACCTGTGCTGCTCA               | GCCAGGTCCAGACGCAGGAT                     |
| Cola1            | mouse     | qPCR    | AGGCATAAAGGGTCATCGTG              | ACCGTTGAGTCCATCTTTGC                     |
| Ezh2             | mouse     | cloning | ACAGGATCCATGGGCCAGACT<br>GGGAAGAA | ATTCTCGAGTCAAGGGATTTCC<br>CATTTCTCGTTCGA |
| Chaer D2166-2737 | mouse     | cloning | TCTGGATCCGCCTCACGGAGTG<br>CAGACTC | TAACTCGAGCTGTCCCAGTAC<br>CTCACACC        |
| Chaer D1666-2737 | mouse     | cloning | TCTGGATCCGCCTCACGGAGTG<br>CAGACTC | TAACTCGAGCTCCCTCTTTCT<br>CATTTGC         |
| Chaer D1059-2737 | mouse     | cloning | TCTGGATCCGCCTCACGGAGTG<br>CAGACTC | TAACTCGAGATGCCGGACCCT<br>TCTACTCT        |
| Chaer D525-2737  | mouse     | cloning | TCTGGATCCGCCTCACGGAGTG<br>CAGACTC | TAACTCGAGTGAGCGCTGTGG<br>AACACAGC        |
| Chaer D0-505     | mouse     | cloning | AGTGGATCCGGTGTGAGGTACT<br>GGGACAG | TAACTCGAGCCACAGTAGGCC<br>TGAGAGCT        |
| Chaer D0-1039    | mouse     | cloning | AGTGGATCCGCAAATGAGGAA<br>AGAGGGAG | TAACTCGAGCCACAGTAGGCC<br>TGAGAGCT        |
| Chaer D0-1646    | mouse     | cloning | TCTGGATCCAGAGTAGAAGGG<br>TCCGGCAT | TAACTCGAGCCACAGTAGGCC<br>TGAGAGCT        |
| Chaer D0-2146    | mouse     | cloning | TCTGGATCCGCTGTGTTCCACA<br>GCGCTCA | TAACTCGAGCCACAGTAGGCC<br>TGAGAGCT        |

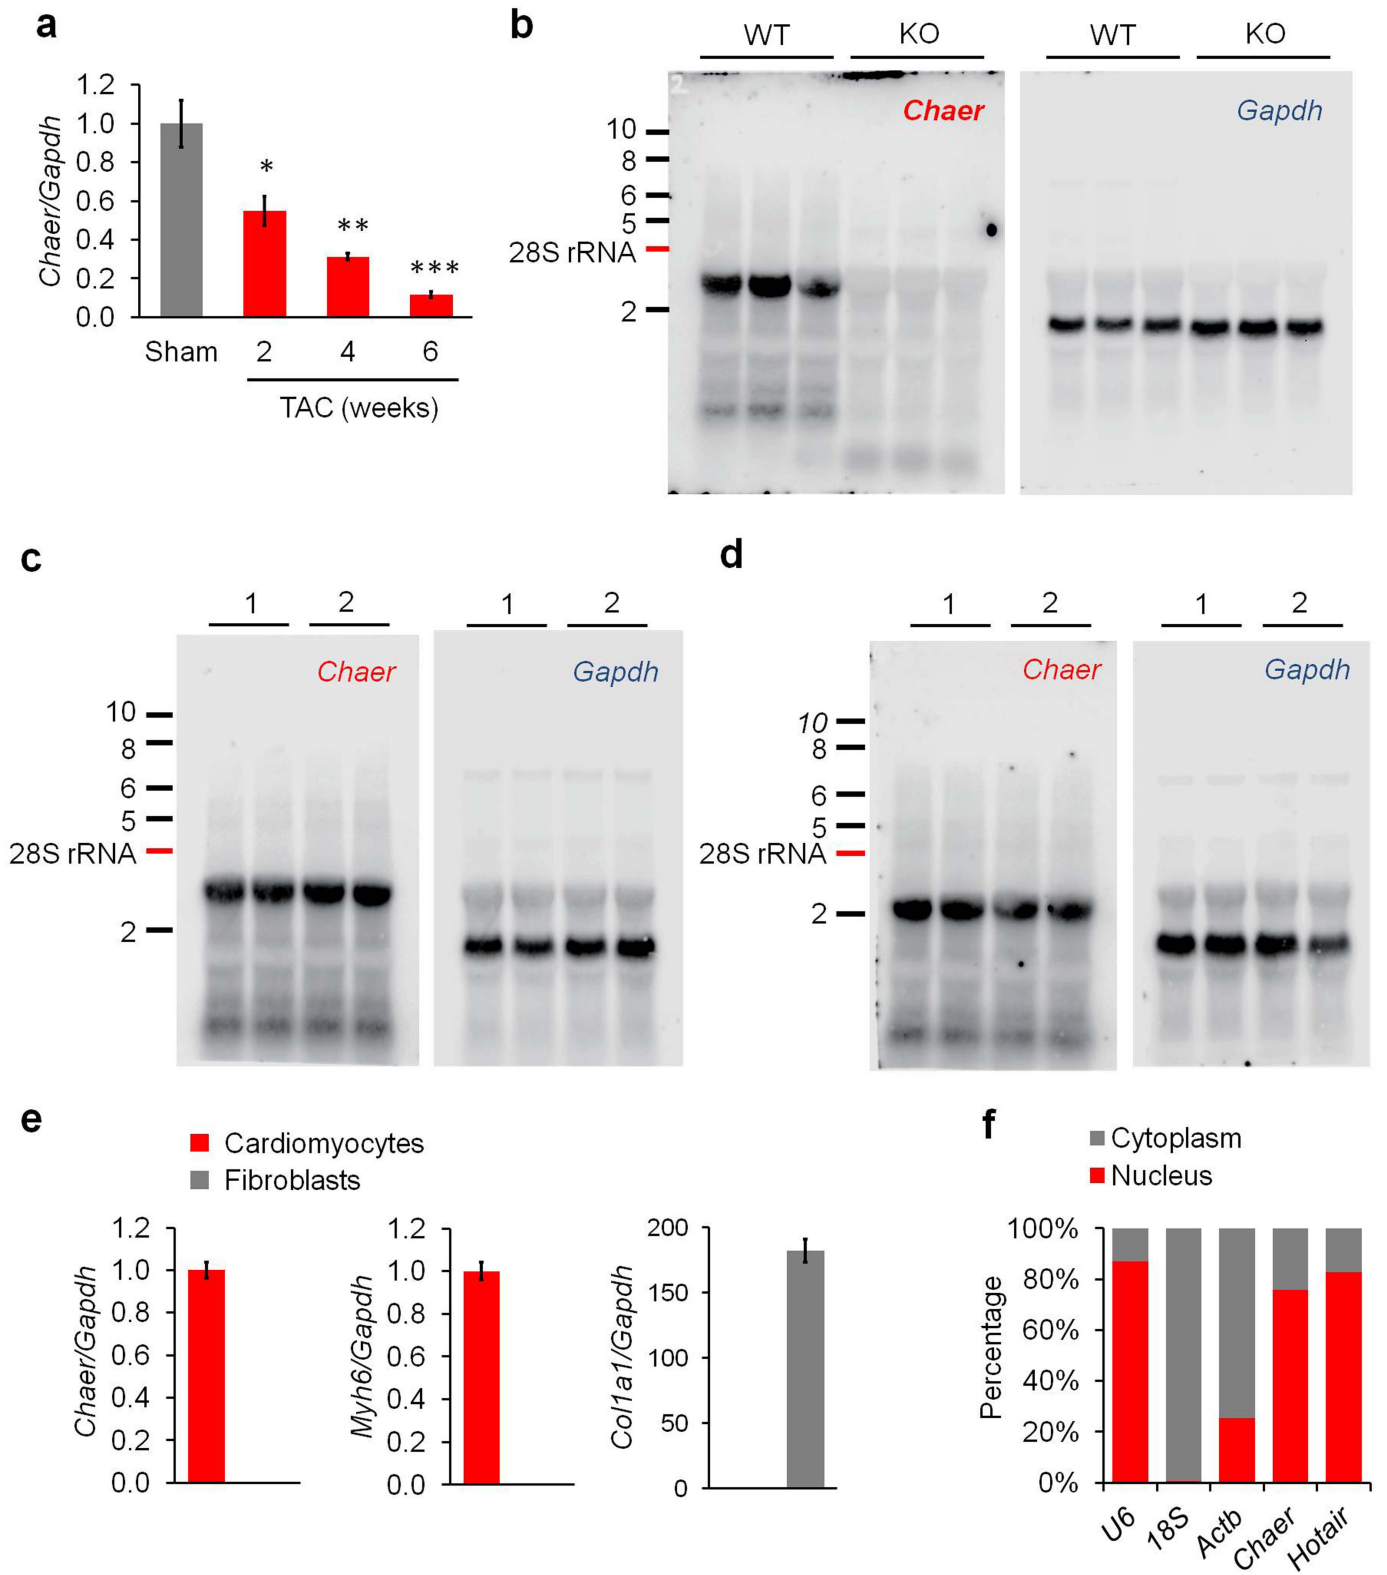

**Supplementary Figure 1. Characterization of *Chaer* expression in mouse.**

(a) RT-PCR for *Chaer* expression in mouse hearts at 2, 4 and 6 weeks after transaortic constriction (TAC) surgery. Data were mean  $\pm$  s.e.m. n =4. \* $P < 0.05$ , \*\*  $P < 0.01$ , \*\*\*  $P < 0.001$  versus sham (Students'  $t$  test). (b) Northern blot analysis for *Chaer* and glyceraldehyde 3-phosphate dehydrogenase (*Gapdh*) in wild-type (WT) and *Chaer* knockout (KO) mouse hearts. (c) Northern blot analysis in rat hearts detected a single band of *Chaer* transcript with a size at 2.7 kb. (d) Northern blot analysis in normal human hearts detected a single band of *Chaer* transcript with a size around 2 kb. (e) RT-PCR for expression of *Chaer*, *Myh6* (alpha-myosin heavy chain 6, marker for cardiomyocytes), and *Colla1* (collagen, type I, alpha 1, marker for fibroblasts) in sorted cardiomyocytes and cardiac fibroblasts from adult mouse heart. Data were mean  $\pm$  S.D from triplicates. (f) Subcellular localization of *Chaer* and *Hotair* detected by real-time RT-PCR in cytosol and nuclear fractions from mouse heart. *U6* RNA was used as a nuclear RNA marker, while *18S* and *Actb* (actin, beta) were used as cytosol RNA markers.

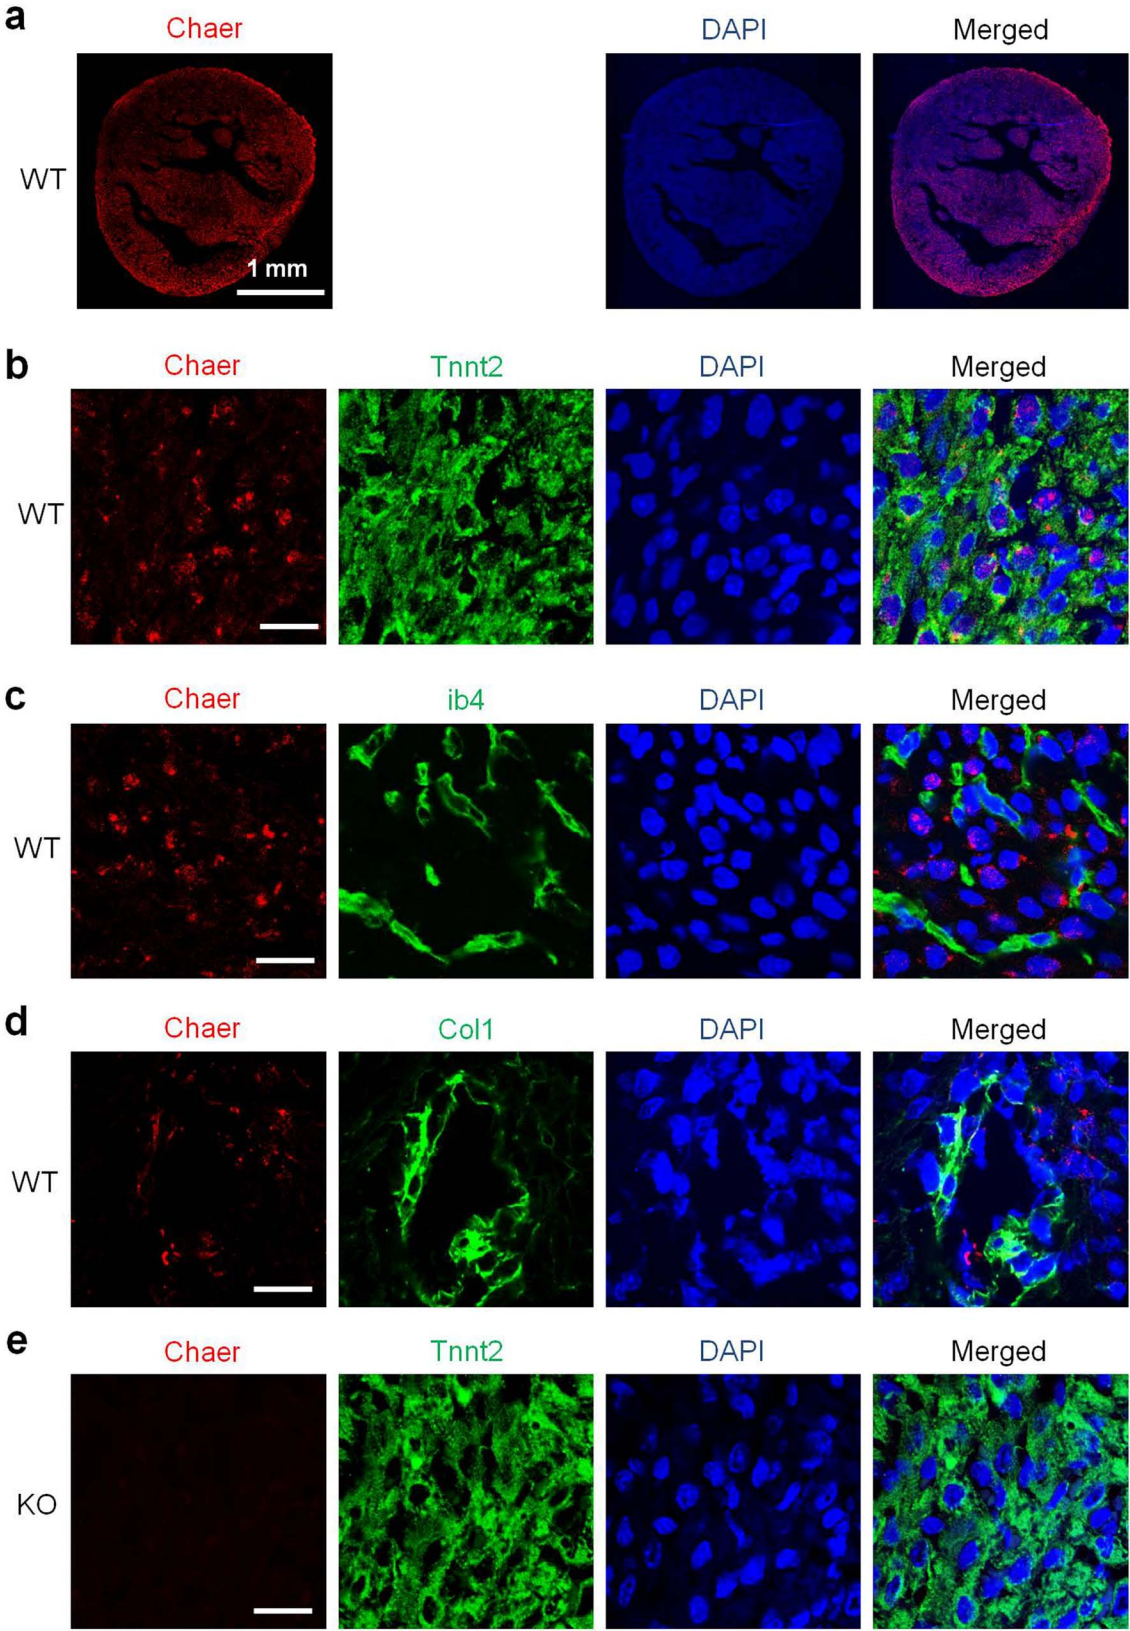

**Supplementary Figure 2. Characterization of *Chaer* in mouse heart.**

**(a-d)** RNA fluorescent in situ hybridization (FISH) assay to visualize *Chaer* in heart of 7-day old mice at large scale **(a)** and small scale **(b-d)**, as well as to specify the cells expressing *Chaer* using markers including Troponin T type 2 (*Tnnt2*) for cardiomyocytes **(b)**, isolectin b4 (*ib4*) for epithelial cells **(c)** and collagen 1 (*Col1*) for a fibroblasts **(d)**. Scale bar **(b-d)**, 20  $\mu\text{m}$ .

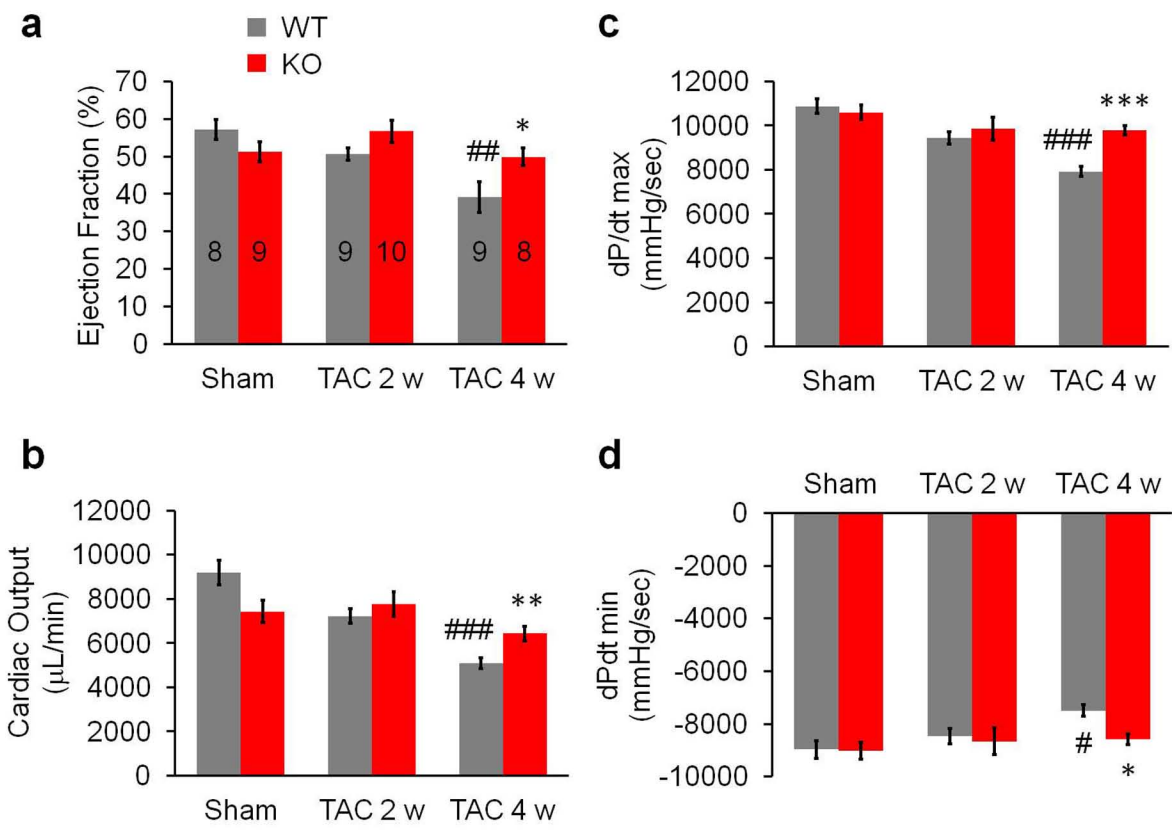

**Supplementary Figure 3. Hemodynamics of cardiac function in wild-type and *Chaer* knockout hearts during TAC-induced hypertrophy.**

(a-d) Cardiac contractility based on pressure-volume (PV) loop measurements collected before, 2 weeks and 4 weeks after transaortic constriction (TAC) surgery in wild-type (WT) and *Chaer* knockout (KO) mice. (a) Ejection fraction. (b) Cardiac output. (c) Maximum dp/dt. (d) Minimum dp/dt. Data were mean  $\pm$  s.e.m. Sample numbers were labeled on bars in panel a. \*  $P < 0.05$ , \*\*  $P < 0.01$ , \*\*\*  $P < 0.001$  versus WT; ##  $P < 0.01$ , ###  $P < 0.001$  versus Sham (Students'  $t$  test).

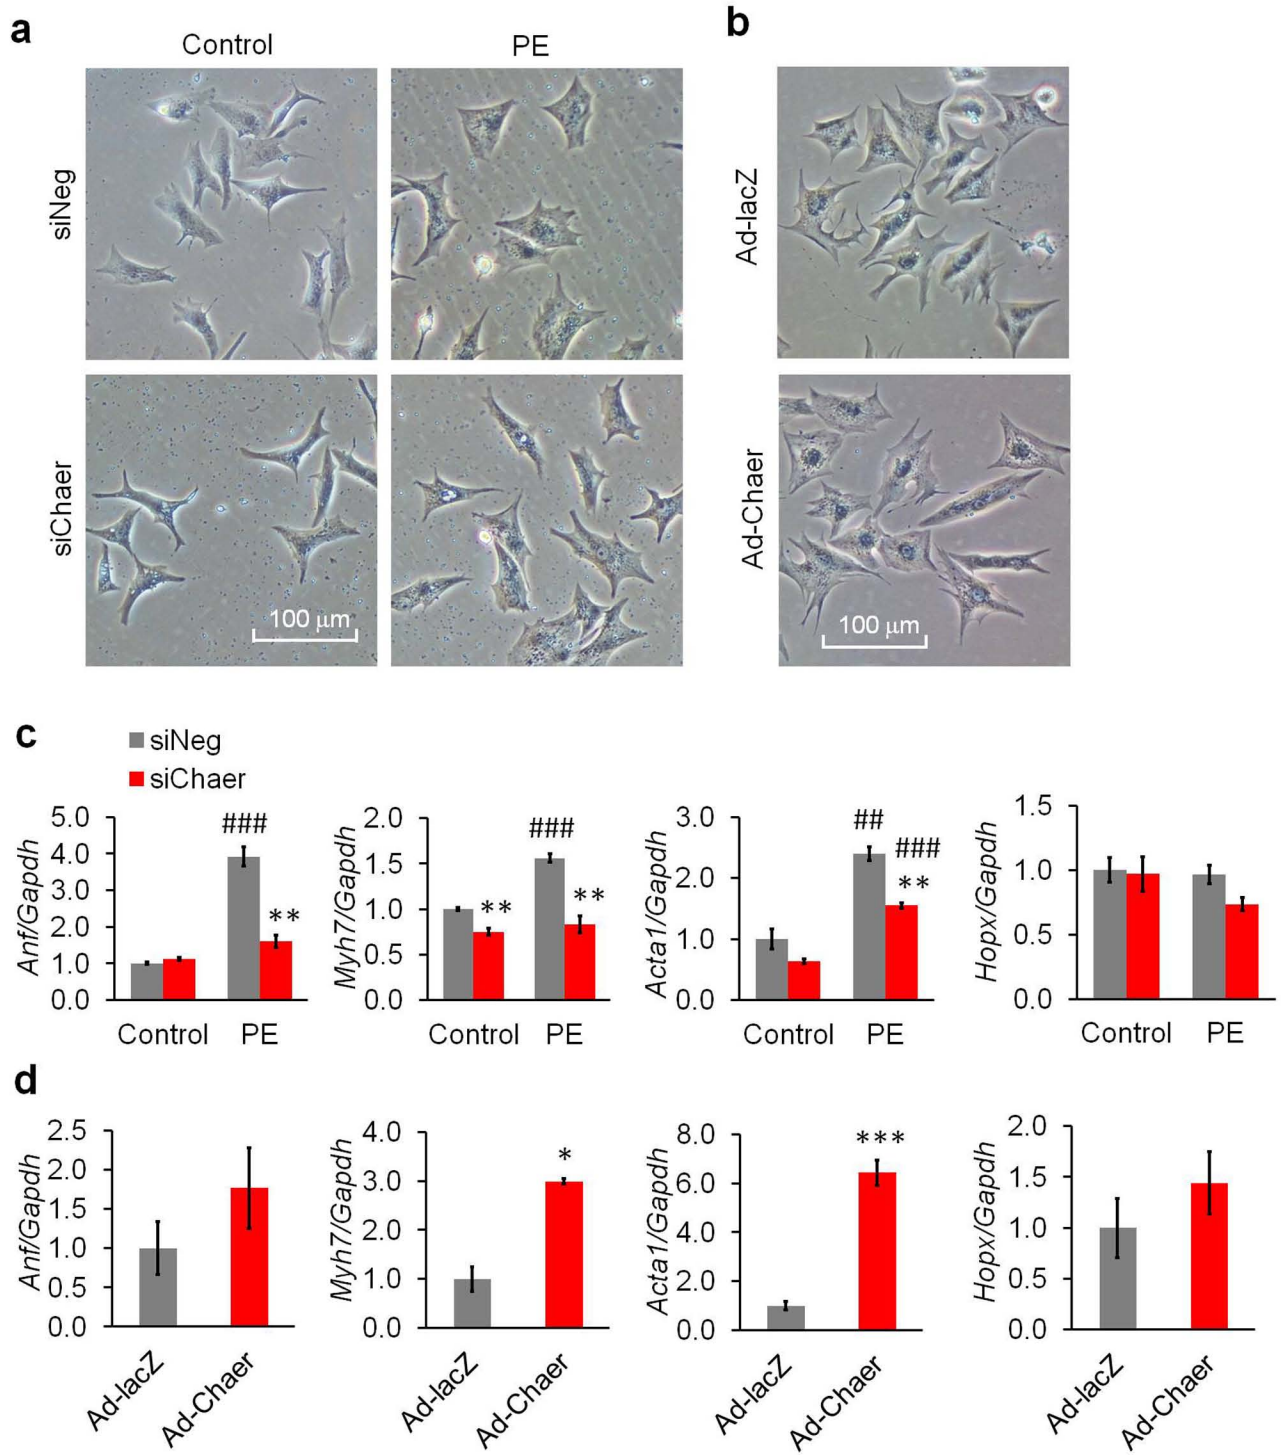



**Supplementary Figure 4. *Chaer* is both necessary and sufficient for the induction of hypertrophic genes.**

(a) Representative images of isolated neonatal rat ventricular myocytes (NRVMs) transfected with *Chaer*-specific siRNA (siChaer) or a negative control siRNA (siNeg) with or without hypertrophic stimulation by phenylephrine (PE, 50  $\mu$ M) from three independent experiments. (b) Representative images of NRVMs infected by adenoviruses expressing *Chaer* (Ad-*Chaer*) or lacZ (Ad-lacZ) from three independent experiments. Scale bars, 100  $\mu$ m. (c) *Chaer* knockdown in NRVMs significantly reduced the induction of hypertrophy genes including *Anf*, *Myh7* and *Acta1* after PE treatment without affecting its neighbor gene HOP domain protein (*Hopx*). Data were mean  $\pm$  s.e.m. n = 3. \*\*  $P < 0.01$  versus siNeg; ##  $P < 0.01$ , ###  $P < 0.001$  versus Control (Students' *t* test). (d) *Chaer* overexpression in NRVMs by Adenovirus significantly increased the expression of *Myh7* and *Acta1* without affecting *Anf* and *Hopx*. Data were mean  $\pm$  s.e.m. n = 3. \*  $P < 0.05$ , \*\*\*  $P < 0.001$  versus Ad-lacZ (Students' *t* test).

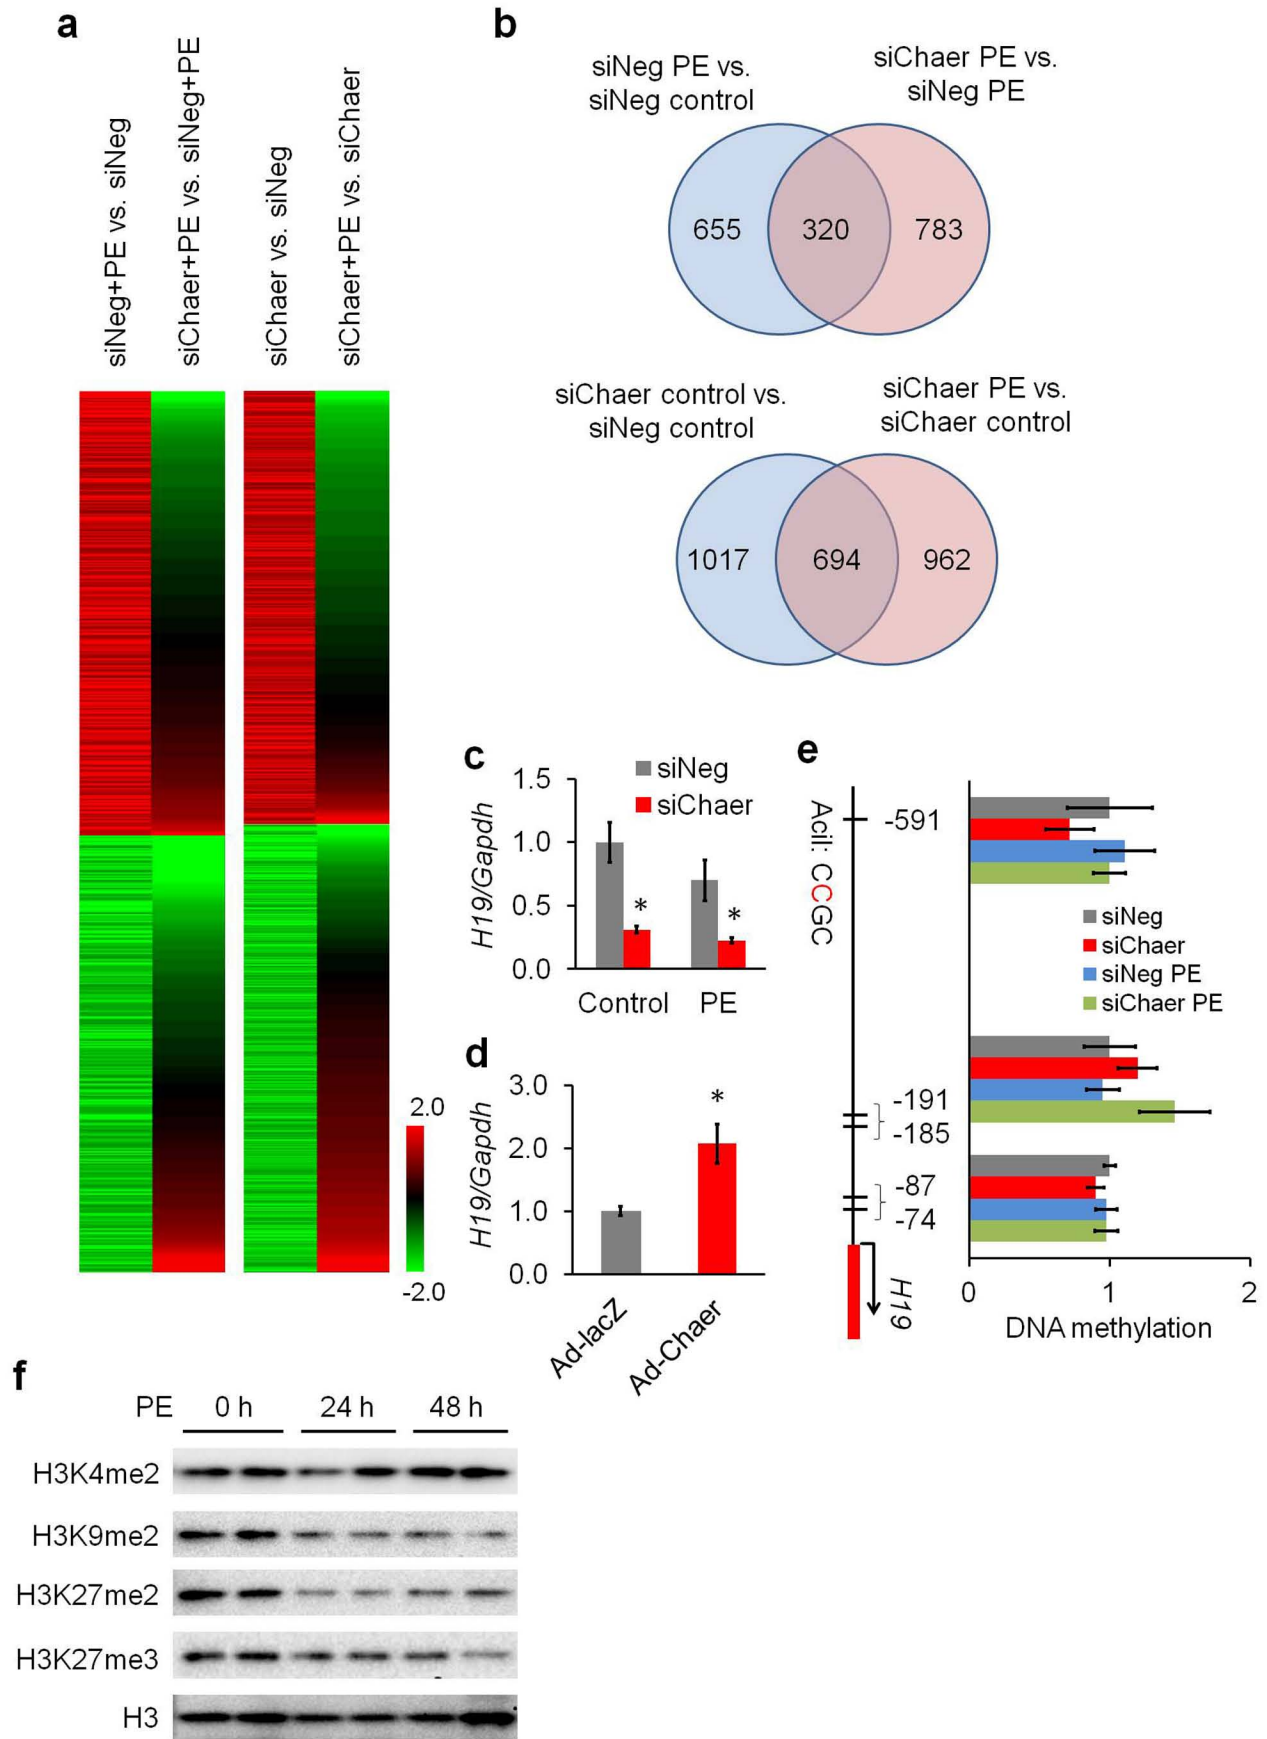

**Supplementary Figure 5. *Chaer* remodels global transcriptome reprogramming during cardiac hypertrophy independent of DNA methylation.**

(a) Heat map of the RNA sequencing data of NRVM transcriptome revealed that half of the genes regulated by phenylephrine (PE) were reversed by siRNA-mediated *Chaer* silence (left), and majority of the genes regulated by *Chaer* knockdown showed opposite regulation by PE treatment (right). siNeg, negative control siRNA; siChaer, *Chaer* specific siRNA. (b) Schematic of gene numbers in four different comparisons and negatively correlating genes shared by siNeg-PE/siNeg-control and siChaer-PE/siNeg-PE (upper), as well as by siChaer-control/siNeg-control and siChaer-PE/siChaer-control. (c) *Chaer* knockdown by siRNA suppressed *H19* expression in NRVMs with or without phenylephrine (PE, 50  $\mu$ M) treatment detected by real-time RT-PCR assay. Data were mean  $\pm$  s.e.m. n = 3. \*  $P < 0.05$  versus siNeg (Students'  $t$  test). (d) Adenovirus-mediated *Chaer* overexpression increased *H19* expression in NRVMs detected by real-time RT-PCR assay. Data were mean  $\pm$  s.e.m. n = 3. \*  $P < 0.05$  versus Ad-lacZ (Students'  $t$  test). (e) DNA methylation levels at *H19* promoter region in NRVMs transfected with siNeg or siChaer under PE treatment or non-treatment. DNA samples with and without AciII digestion (only cuts CCGC without methylation at CpG) from all groups were subjected to qRT-PCR to test three fragments covering the AciII sites at *H19* promoter region. Data were mean  $\pm$  s.d. from triplicates. (f) Immunoblotting analysis for histone methylations (H3K4me2, H3K9me2, H3K27me2, H3K27me3) and total H3 in PE-treated NRVMs treated at different time points (0, 24, 48 h).

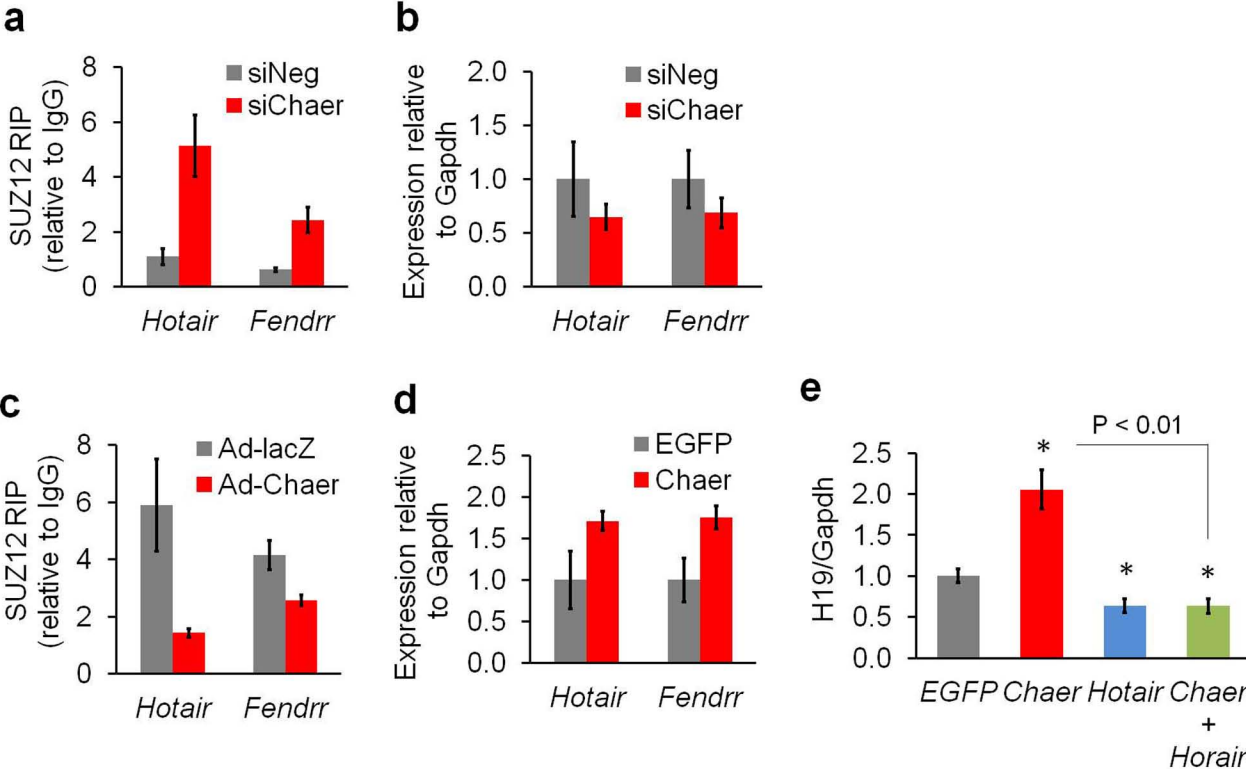

**Supplementary Figure 6. *Chaer* competes with PRC2-binding lncRNAs.**

(a) *Chaer* silence with specific siRNA enhanced PRC2 interaction with other lncRNAs (*Hotair* and *Fendrr*) in NRVMs. RNA immunoprecipitation (RIP) analysis was performed with SUZ12 antibody. Data were mean  $\pm$  s.d. from triplicates. (b) *Chaer* knockdown did not change the RNA expression levels of *Hotair* and *Fendrr*. (c) SUZ12 RIP analysis showing that *Chaer* overexpression in mouse embryonic fibroblasts (MEFs) suppressed PRC2 interaction with *Hotair* and *Fendrr*. (d) *Chaer* overexpression in MEFs did not change the RNA expression levels of *Hotair* and *Fendrr*. (e) Co-expression of *Hotair* abolished the increase of *H19* expression by *Chaer* overexpression in MEFs. Data were mean  $\pm$  s.e.m. n = 3. \*  $P < 0.05$ , \*\*  $P < 0.01$  versus corresponding siNeg, Ad-lacZ or EGFP controls (Students'  $t$  test).

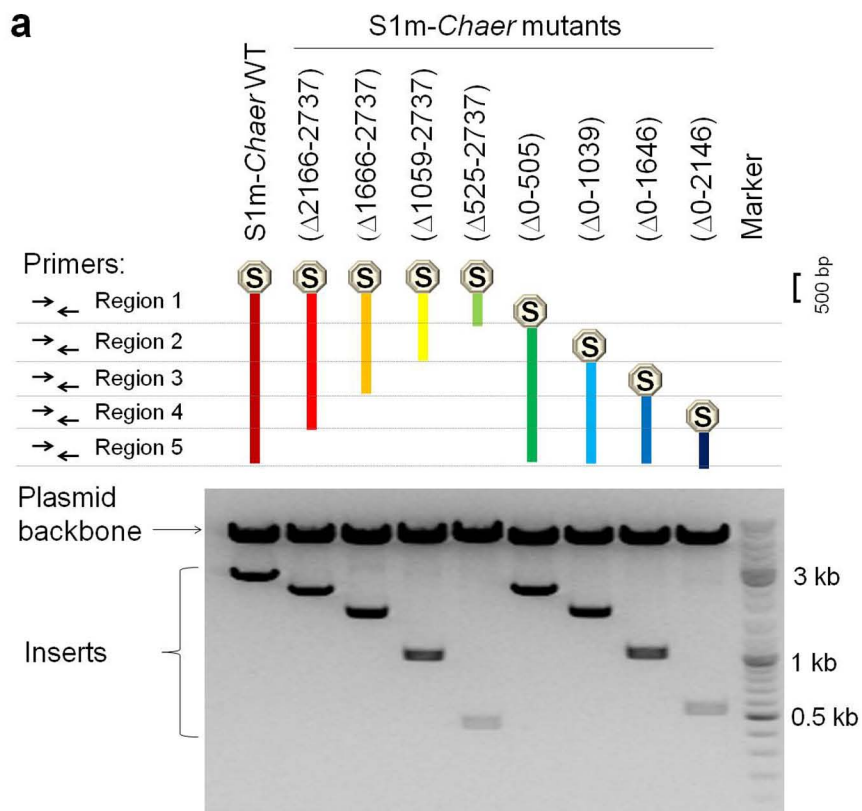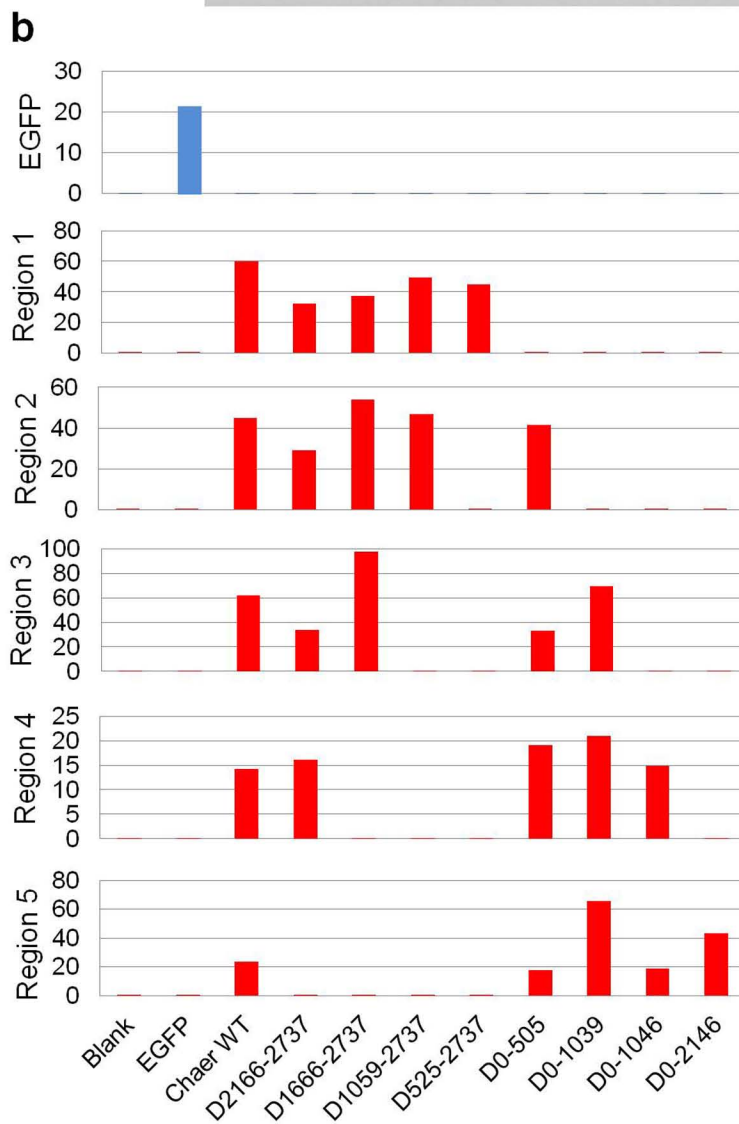

**Supplementary Figure 7. Validation of the truncated *Chaer* mutations for tagged RNA pull-down assay.**

(a) *Chaer* mutations were truncated at roughly 500 bp from both 5' and 3' ends (schematic illustrated upper), and cloned into pcDNA5-CMV using BamHI and XhoI right behind a modified S1 tag (S1m). After amplification, the plasmids were double digested with BamHI/XhoI and separated on 1% agarose gel (lower). (b) Real-time RT-PCR with primers illustrated in (a) confirmed that all mutations were stably and evenly expressed in MEFs.

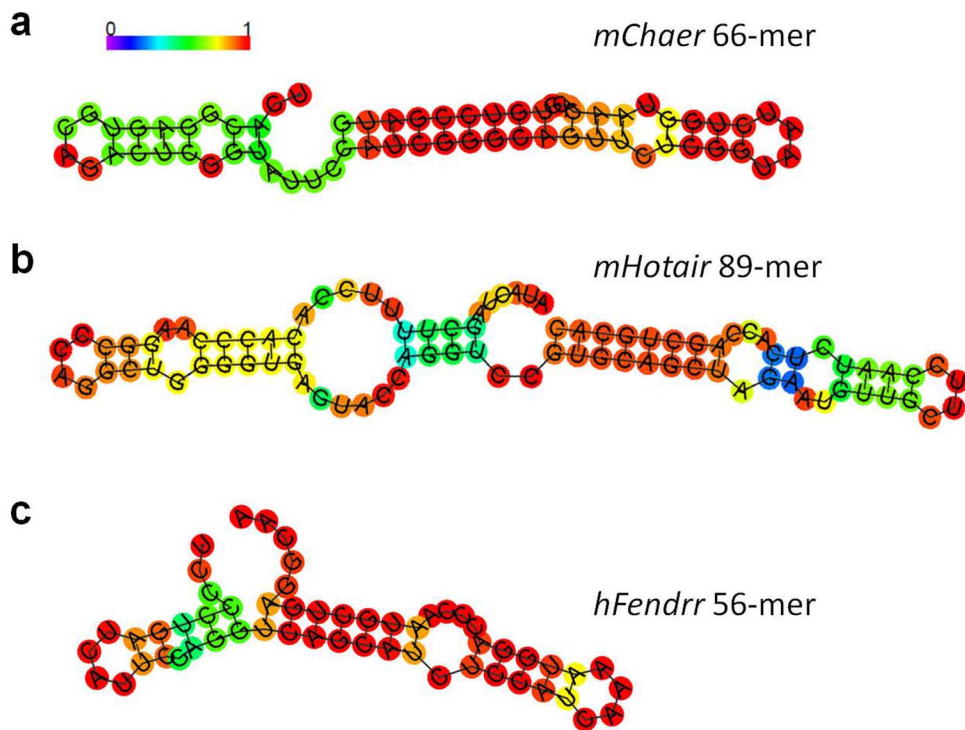

**d**

**Red: Interacting residues** **Blue: Non-interacting residues**

MGQTGKKSEKGPVCWRKRVKSEYMRLRQLKRFRRRADEVKTMFSSNRQKILERTETLNQEW  
 KQRRIQPVHIMTSVSSLRGTRECSVTSDLDFPAQVIPLKTLNAVASVPIMYSWSPLQQNF  
 MVEDETVLHNIPYMGDEVLDQDGTFFIELIKNYDGKVHGDRECGFINDEIFVELVNALGQ  
 YNDDDDDDGDDPDEREEKQKDLLEDNRDDKETCPPRKFPADKIFEAISSMFPDKGTAEEL  
 KEKYKELTEQQLPGALPPECTPNIDGPNKSVQREQSLHSFHTLFCRRCFKYDCFLHPPFH  
 ATPNTYKRKNTETALDNKPCGPQCYQHLEGAKEFAAALTAERIKTPPKRPGGRRRGRLPN  
 NSSRPSTPTISVLESKDTDSDREAGTETGGENNDKEEEEKDETSSSSEANSRCQTPIKM  
 KPNI~~EP~~PENVEWSGAEASMF~~R~~VLIGTYYDNFCAIARLIGTKTCRQVYEF~~R~~VK~~ES~~SIAPV  
 PTEDVDTPPRKKK~~R~~HRLWAAHCRKIQLKKDGSSNHVYNYQPCDHPRQPCDSSCPCVIAQ  
 NFCEKFCQCSSE~~C~~QNRFP~~G~~CRCKAQCN~~T~~KQCPCYLAVRECDPLCLTCGAADHWDSKNVS  
 CKNCSIQRGS~~K~~HLLAPSDVAGWGIFIKDPVQKNEFISEYCGEIIISQDEADRRGKVYDK  
 YMCSFLN~~L~~NDFVVDAT~~R~~KG~~N~~KIRFANHSVNPNCYAKVMMVNGDHRIGIFAKRAIQTGE  
 ELFFDYRYSQADALKYVGI~~R~~EMEIP



**Supplementary Figure 8. Sequence details underlying interaction between Ezh2 and lncRNAs.**

(a-c) RNA secondary structures of motifs from mouse *Chaer* (a), mouse *Hotair* (b) and human *Fendrr* (c) were predicted by RNAfold WebServer (<http://rna.tbi.univie.ac.at/cgi-bin/RNAfold.cgi>) based on minimum free energy (MFE) and partition function. Similar motifs with resemble stem-loop structures were identified among three lncRNAs. (d) Ezh2 RNA binding residues were predicted by RNA-Protein Interaction Prediction (RPIseq, <http://pridb.gdc.b.iastate.edu/RPISeq/>). Predicted interacting residues were labeled with red, whereas non-interacting residues were labeled with blue.

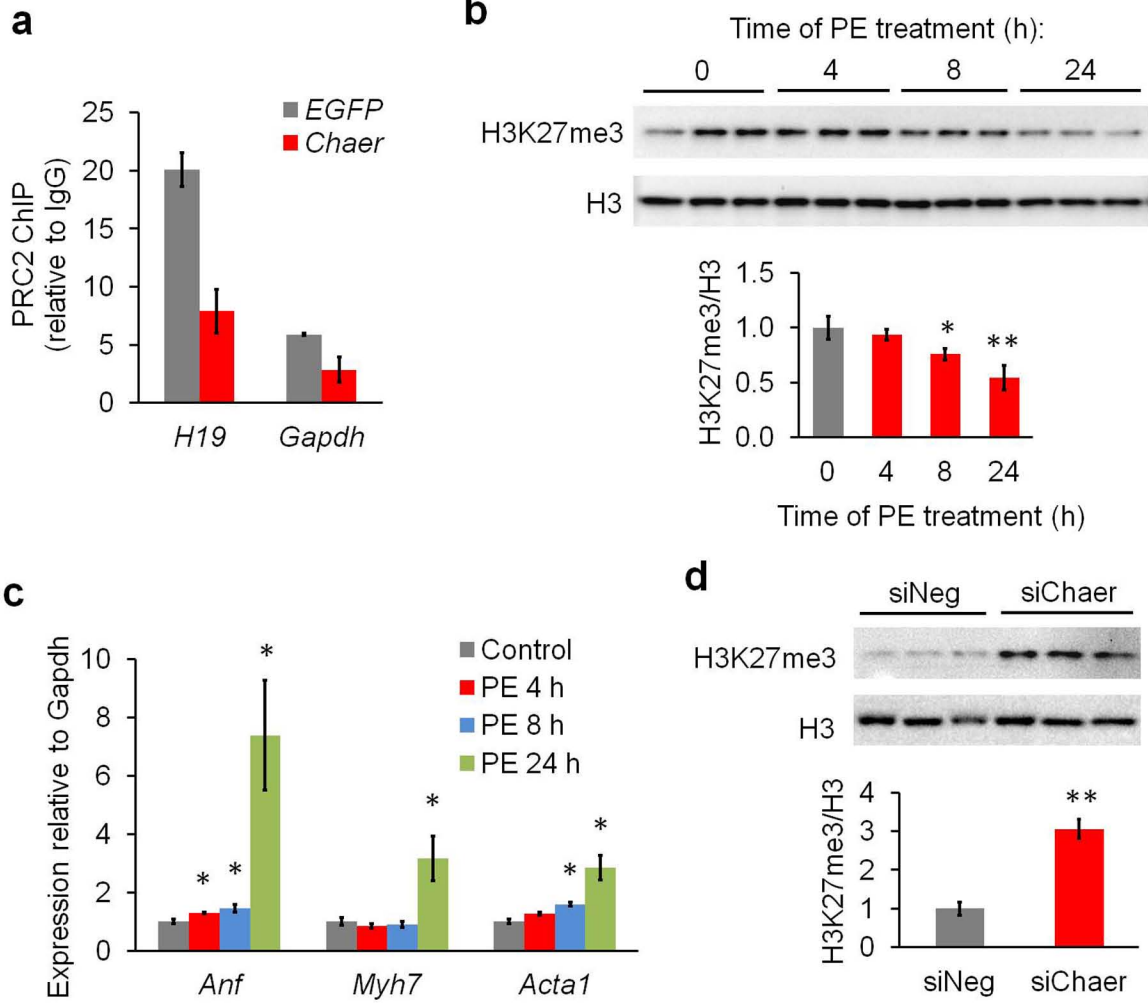

**Supplementary Figure 9. Correlation between histone methylation at H3K27 and hypertrophic gene induction in PE-induced cardiomyocyte hypertrophy.**

(a) Chromatin immuno-precipitation (ChIP) analysis with anti-Ezh2 antibody showing the PRC2 targeting to promoter regions of *H19* and *Gapdh* in MEFs expressing EGFP or *Chaer*. Data were mean  $\pm$  s.d. from triplicates. (b) PE treatment caused a gradual decrease of global H3K27me3 levels as early as 8 h after PE treatment. Data were mean  $\pm$  s.e.m. n = 3. \* $P < 0.05$ , \*\*  $P < 0.01$  versus 0 h of PE treatment (Students' *t* test). (c) Time-course of PE-induced expression of hypertrophic genes *Anf*, *Myh7* and *Acta1*. Data were mean  $\pm$  s.e.m. n = 3. \*  $P < 0.05$  versus Control (Students' *t* test). (d) *Chaer* silence with siRNA rescued the decreased global H3k27me3 levels in PE-treated NRVMs. Data were mean  $\pm$  s.e.m. n = 3. \*\*  $P < 0.01$  (Students' *t* test).

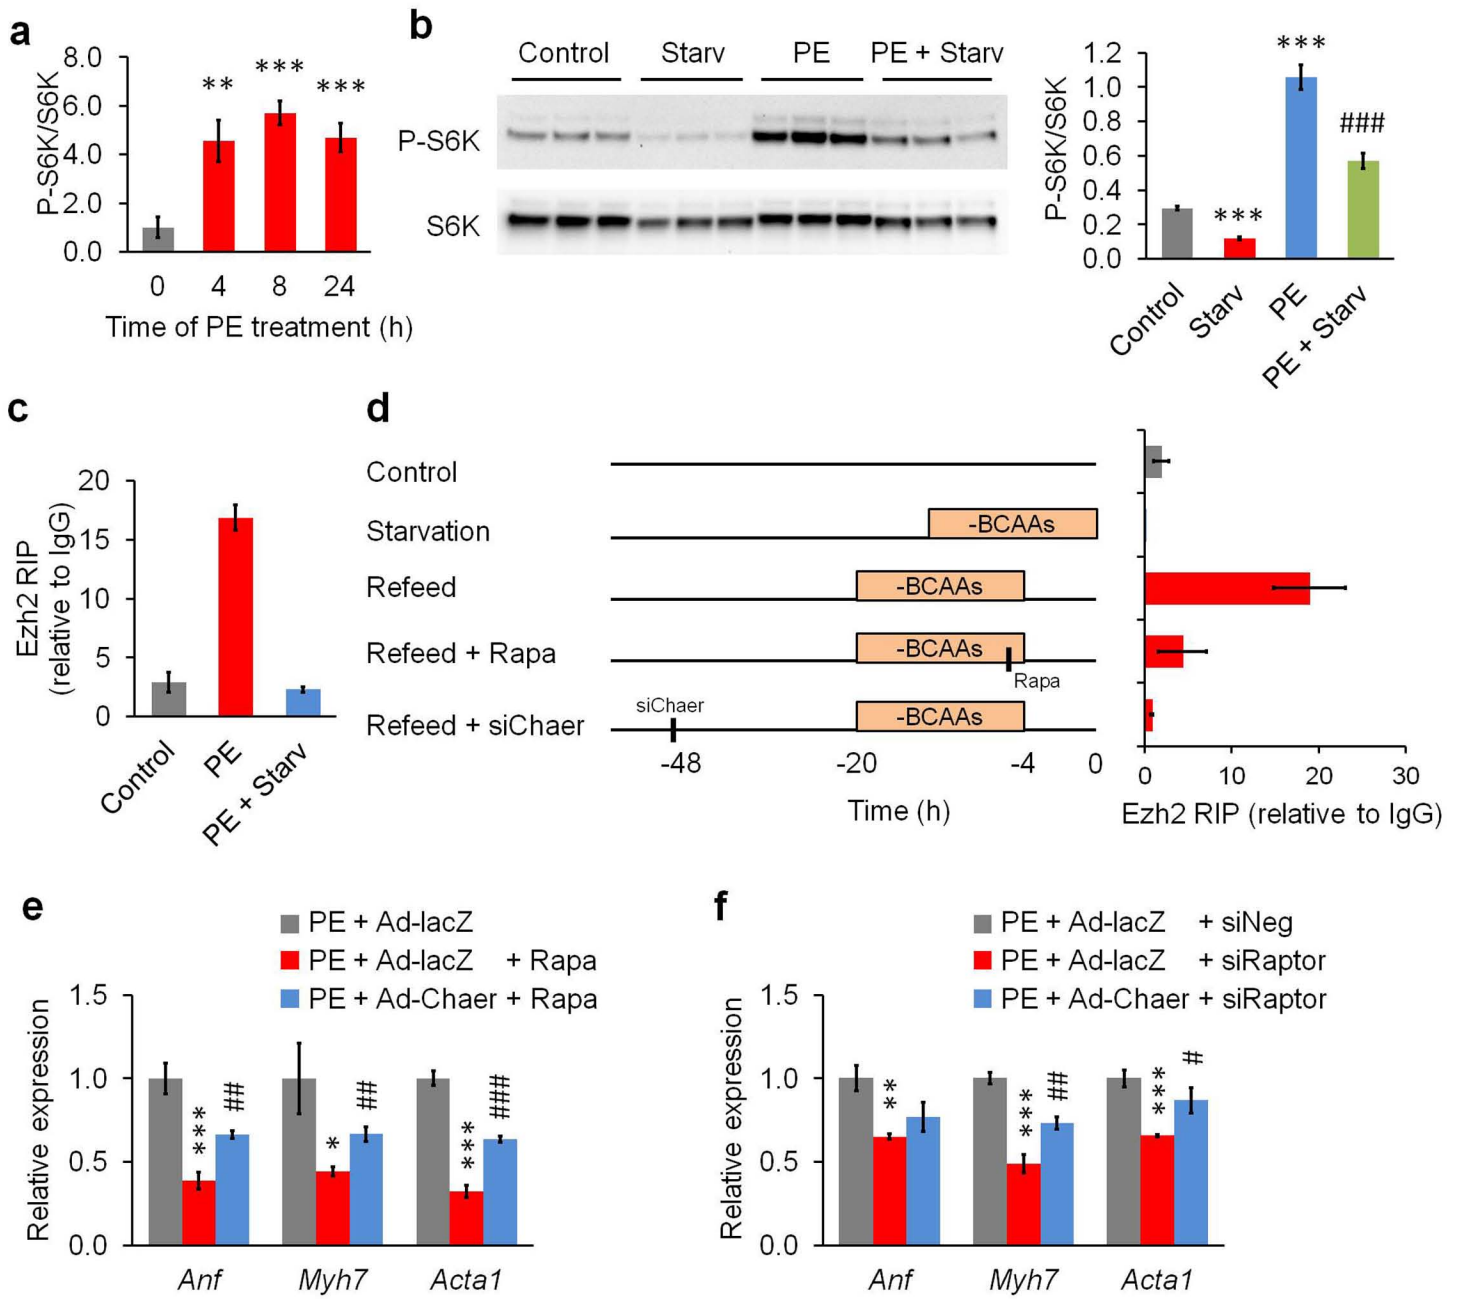

**Supplementary Figure 10. MTOR signaling pathway mediates the enhancement of *Chaer*-PRC2 interaction upon hypertrophy stimulation.**

(a) Analyzed data for mTOR downstream target S6K phosphorylation immuno-blot showed in **Figure 5a**. Data were mean  $\pm$  s.e.m.  $n = 3$ . \*\*  $P < 0.01$ , \*\*\*  $P < 0.001$  versus control (Students'  $t$  test). (b) Immuno-blot and analyzed data for S6K phosphorylation in NRVMs with and without starvation under control or PE treatment. Data were mean  $\pm$  s.e.m.  $n = 3$ . \*\*\*  $P < 0.001$  versus control; ###  $P < 0.001$  versus PE (Students'  $t$  test). (c) RIP analysis for *Chaer* with anti-Ezh2 antibody showing that starvation blocked PE-enhanced *Chaer*-PRC2 interaction. Data were mean  $\pm$  s.d. from triplicates. (d) Effects of BCAA starvation and refeeding NRVMs with or without rapamycin (Rapa) treatment or *Chaer* knockdown on *Chaer*-PRC2 interaction detected by Ezh2 RIP analysis. Timeline of treatments is schematically illustrated (left). Data were mean  $\pm$  s.d. from triplicates. (e,f) *Chaer* over-expression rescued the suppressed expression of *Anf*, *Myh7* and *Acta1* by Rapa (e) or siRaptor (f) in PE-treated NRVMs. Data were mean  $\pm$  s.e.m.  $n = 3$ . \* $p < 0.05$ , \*\* $p < 0.001$ , \*\*\* $p < 0.001$  versus PE controls; # $p < 0.05$ , ## $p < 0.01$ , ### $p < 0.001$  versus Ad-lacZ with Rapa or siRaptor (Students'  $t$  test).

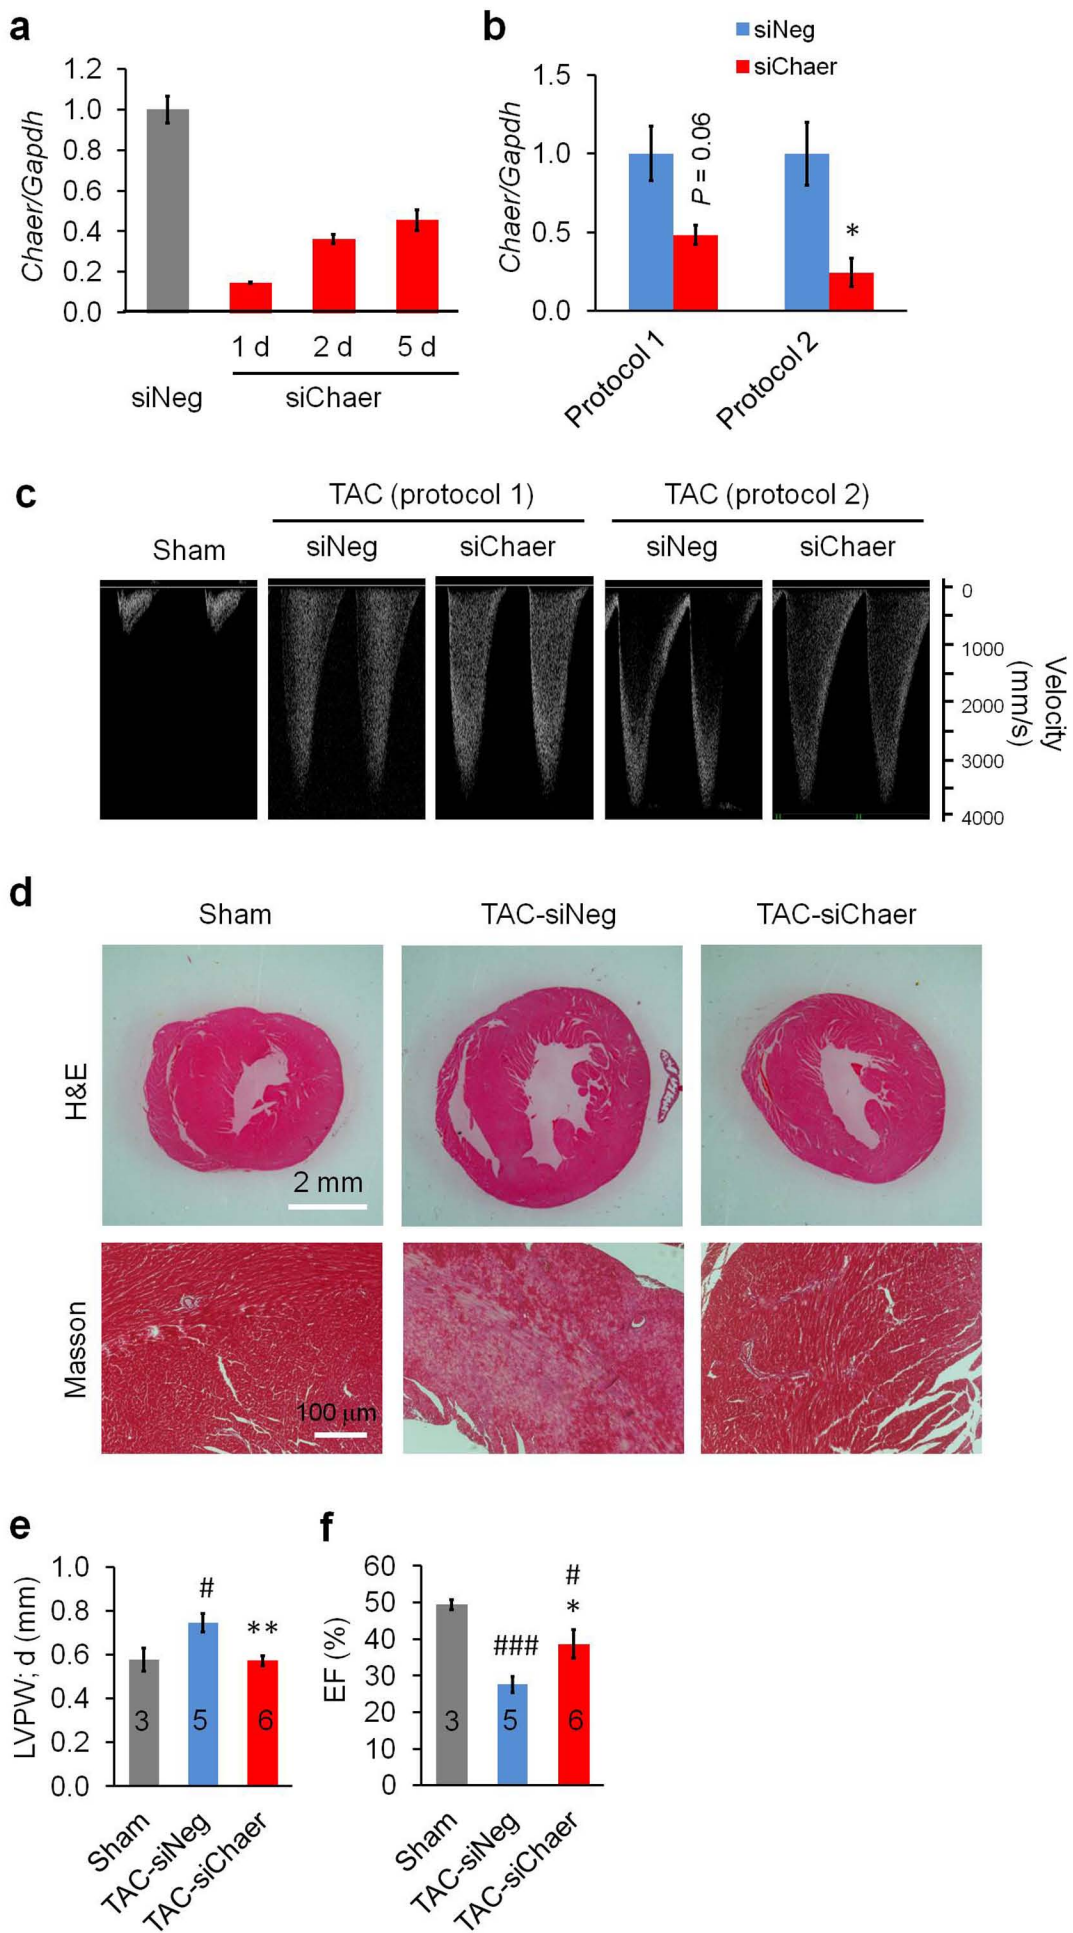

**Supplementary Figure 11. Pre-empty knockdown of *Chaer in vivo* blocks pathological remodeling in TAC-induced hypertrophy.**

(a) Knockdown efficiency of nanoparticle-mediated transfection of siChaer in mouse hearts at 1, 2 and 5 days after injection. Data were mean  $\pm$  s.d. from triplicates (b) Validation of *Chaer* knockdown efficiency in both strategy 1 and 2 (**Fig. 6b**) by real-time RT-PCR. Data were mean  $\pm$  s.e.m. n = 3. \*p < 0.05 versus siNeg (Students' *t* test). (c) TAC surgery caused even acceleration of the blood velocity within the banding site of aorta in all groups evaluated by Echocardiography at pulsed-wave color Doppler mode. (d) Pre-empty knockdown of *Chaer in vivo* prevented the progression of fibrosis measured by Masson tri-chrome staining. (e-f) In addition to heart weight/body weight ratio, siChaer injection before TAC (protocol 1) significantly reduced LV posterior wall thickness at diastole (LVPW; d) (e) and preserved the ejection fraction (EF) (f) evaluated by Echocardiography. Data were mean  $\pm$  s.e.m. Sample numbers were labeled on bars. \*p < 0.05, \*\*p < 0.01 versus siNeg; #p < 0.05, ###p < 0.001 versus Sham (Students' *t* test).

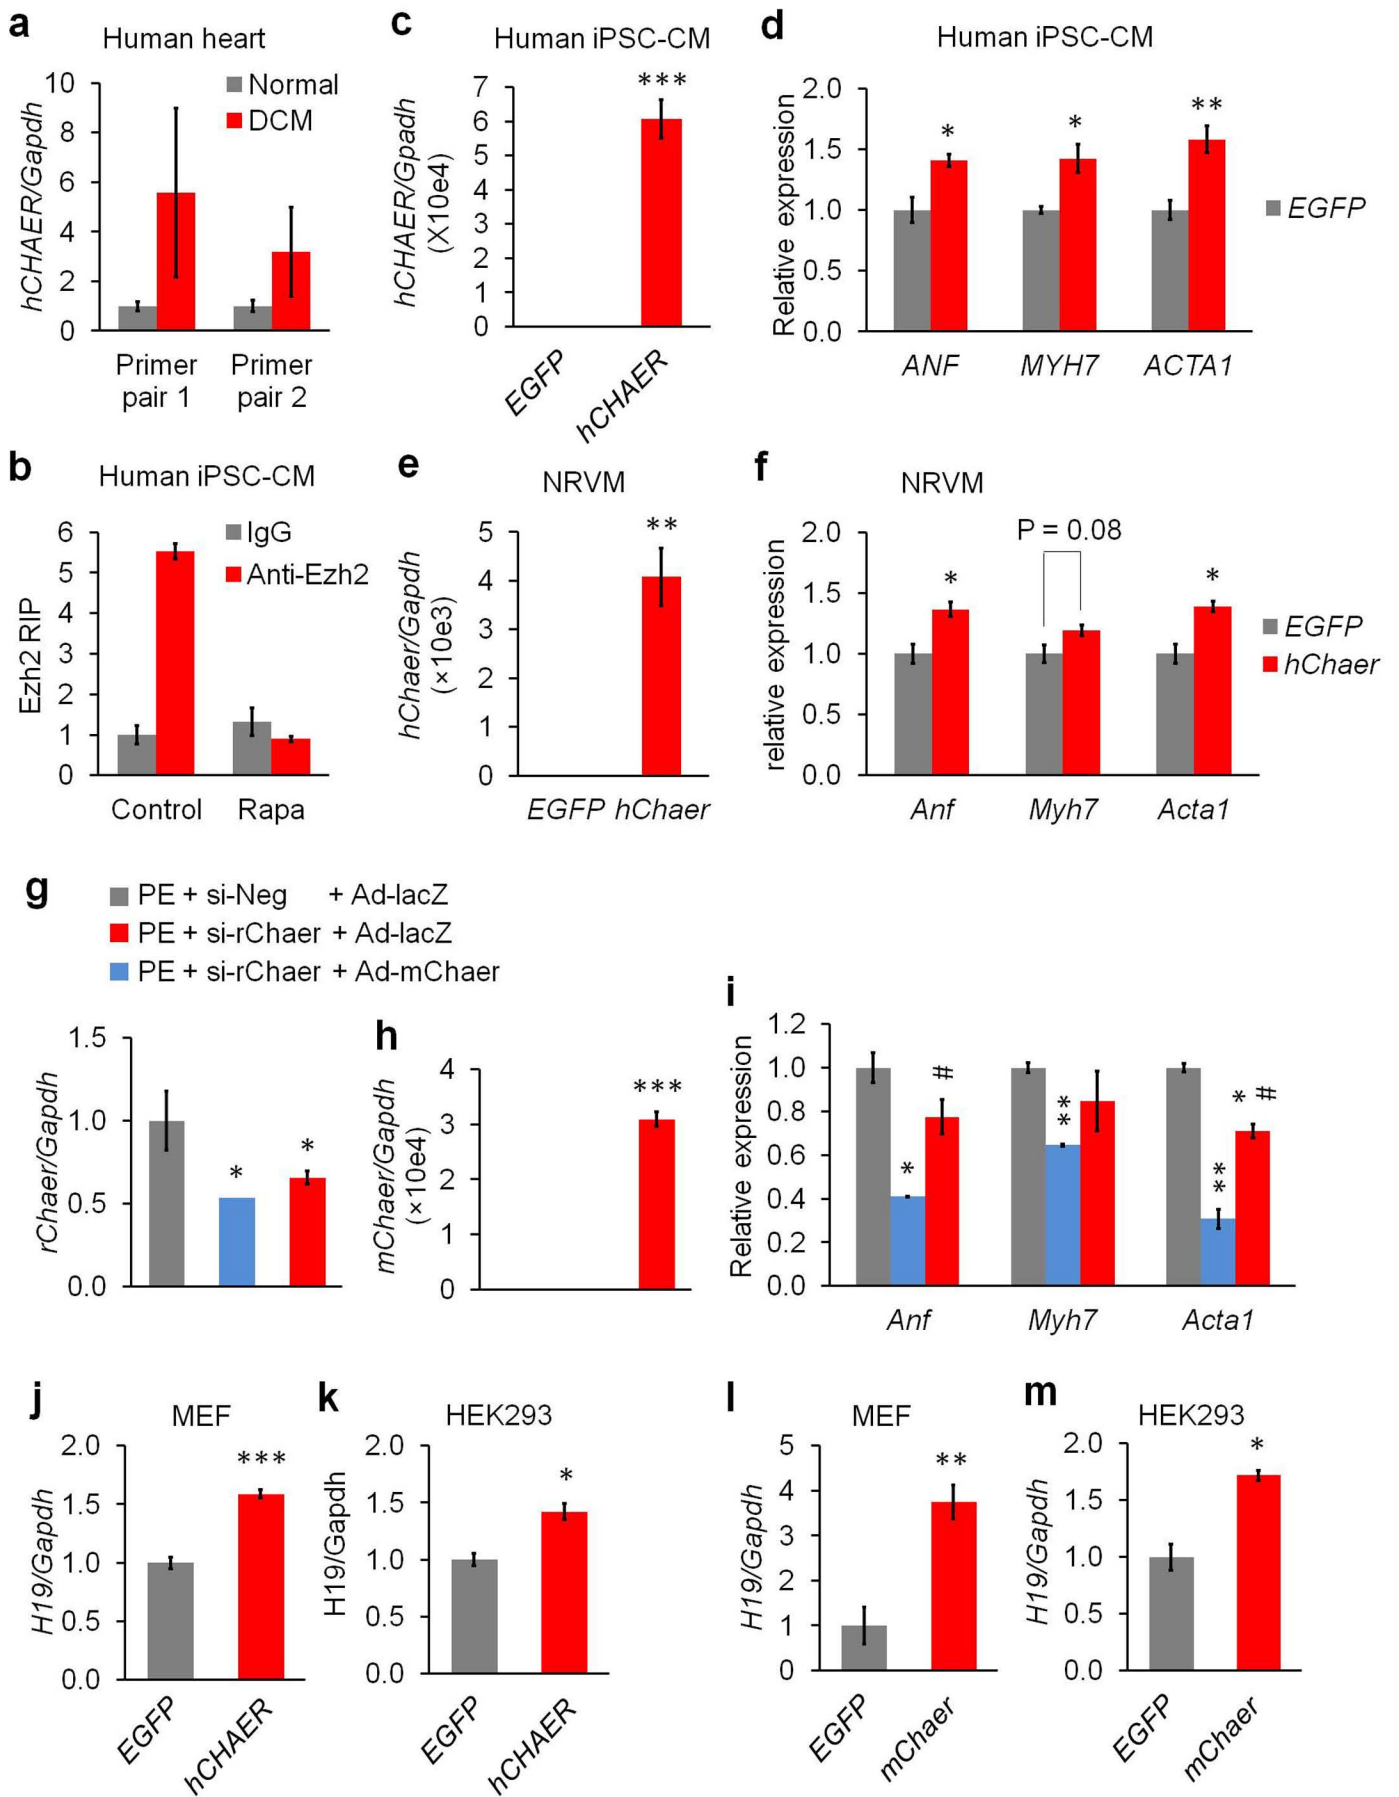



**Supplementary Figure 12. Conservation of *Chaer* function in mouse, rat and human cells.**

(a) Expression of human *CHAER* (*hCHAER*) homolog in patient hearts with dilated cardiomyopathy (DCM) measured by real-time RT-PCR using two pairs of primers targeting human *CHAER*. Data were mean  $\pm$  s.e.m. n = 4. (b) RNA immunoprecipitation (RIP) assay with anti-Ezh2 antibody measuring its binding with *hCHAER* homolog in induced pluripotent stem cell-derived cardiomyocytes (iPSC-CM) with or without Rapamycin (inhibitor of mTOR signaling; 20 nM) treatment. Data were mean  $\pm$  s.d. from triplicates. (c,d) Effects of *hCHAER* overexpression using nanoparticle-mediated transfection (c) on the mRNA levels of hypertrophic genes *Anf*, *Myh7* and *Acta1* in iPSC-CMs (d). Data were mean  $\pm$  s.e.m. n = 3. \**P* < 0.05, \*\**P* < 0.01 versus EGFP (Students' *t* test). (e,f) Effects of *hCHAER* overexpression using nanoparticle-mediated transfection (e) on the mRNA levels of hypertrophic genes *Anf*, *Myh7* and *Acta1* in neonatal rat ventricular myocytes (NRVMs) (f). Data were mean  $\pm$  s.e.m. n = 3. \**P* < 0.05, \*\**P* < 0.01 versus EGFP (Students' *t* test). (g-i) Overexpression of mouse *Chaer* (*mChaer*) with Adenovirus (h) in NRVMs with rat *Chaer* (*rChaer*) knockdown (g) rescued the suppression on PE-induced expression of *Anf*, *Myh7* and *Acta1* (i). Data were mean  $\pm$  s.e.m. n = 3. \**P* < 0.05, \*\**P* < 0.01, \*\*\**P* < 0.001 versus PE + siNeg + Ad-lacZ; #*P* < 0.05 versus PE + si-rChaer + Ad-lacZ (Students' *t* test). (j,k) Effects of *hCHAER* overexpression on *H19* expression in MEFs (j) and HEK293 cells (k). Data were mean  $\pm$  s.e.m. n = 3. \**P* < 0.05, \*\*\**P* < 0.001 versus EGFP (Students' *t* test). (l,m) Effects of *mChaer* overexpression on *H19* expression in MEFs (l) and HEK293 cells (m). Data were mean  $\pm$  s.e.m. n = 3. \**P* < 0.05, \*\*\**P* < 0.001 versus EGFP (Students' *t* test).
