# Supplementary material
Source: PubMed Central journal article supplement (PMC5053883)
Supplement: NIHMS808830-supplement-2.pdf [file NIHMS808830-supplement-2.pdf]

***Chaer* sequence information in mouse, rat and human:**

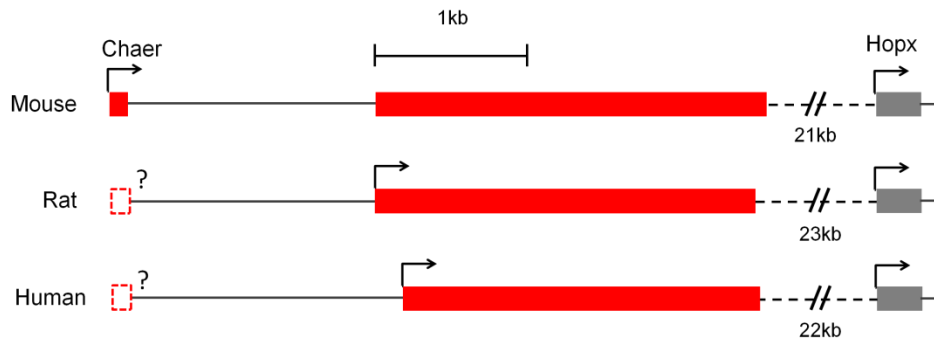

(functional motifs were highlighted)

> mouse Chaer 2737 bp

GGTGGAGCCAGGGGAGGGACGAGGTGGGGTGGGGTGGGGCTGCTAGGAAAGCACTGTG  
GAATTCAGAGTGAGGAGGGACTGGAGGGAGCTGGGTCTCCATTCTGCATTTACTGGGGCC  
TCACGGAGTGCAGACTCGGTATTCCATCGGGCAGTTCTCGGTAATCTGGTAACACGTGTC  
CGATGCCAGTTCCAGTTCTCTGGTTGAATCTGATAGGTACAGATCCCAAACCCATGTTGG  
ACATGGTGTGGGCAGGATAACCTGGCAGGCCTGGGAGTCAAATGAAGAGAGGAGCTGAGG  
GCTGCTGCAAAAGTCTCAGGATGGCTGACTTGTCTCCTTCTGAAGTTTCTAGACTTGACT  
CTGACACAAAAGGCCTTTGGGAGAACAGACTCAAGGGACAAGGGGTGATGCTTTCGCTTCCC  
TCATTTGGAGCCCCTTTCAGAGGGGAAAACTCACAGGCAGGAACCTGCGTGCCAGCCCTGA  
CCCAGAGCAACAGTGAACAGTCCCCGCTGTGTTCCACAGCGCTCATCCAGAAACACTGCG  
GGGTTTCCATCACATTTCTGCAGTCCACAGGAAACCTGGAAGCTGAGTCTTTTTCTTCTGT  
GATCTCTGCCCTCCCCTGCTGGCCTGTGCTCTATGGGAGCTCATTAGCTGAACCCAGGAC  
CAAGGACAAGCAAGCAGGGCTGAATAGAGACTTTATGAACAGCTGCTACTCCGTGGTGT  
GTCTCCTTGTGAAGAAAAGGGGTGAGCCTGGAAGTAGAAAAGCAGGGGATTTGGTTTTGTTA  
TTGCGTAATCTTCCCTGGAAGGCGGGCGAGGGGGTGGTAAGAAGAGCATTGTGCACTTGA  
ACTGTCTGCTTGGGACAGTATTCCCTGACCCCTTTCAGGACTTCCATAACTTGGCACTG  
AGTTGGCCCTTAAGTTGGCAAAACAAACCTTGGCACTGAGCAACACTTAAGAGGTAGAAAAG  
AATGTTTTTCATGCCTTCAGCAGCTCCAGCAGACTCTGAAGGCTGAGCGGTAGCAGTTCTA  
TCGCCCTGCCATCCAGCCCAGAGTAGAAGGGTCCGGCATCTCCAGCCAGGTAGCCTGTAT  
GTCAGGCTCACATAGGCTATGTATGGCATCTCCATCTCGGGAGAACAAGCGTTGATGCTT  
CAGTTCTGGCCTCGTCAATTACCAATGTCTTCAATGGTCCCTCTTTACTCTGAGGGGAGC  
AGAAAAGGGGGTCTCATTGGATGCCATGAGATAAGCTAATTTCTAGAACCTTCTCTATC  
TTCTGTGTCAGTTCTAGTTTGGATTAGCGATTAGCTGTCAGAACCAGACAGACAACCTTACT  
CAGACAAGTACCAGATGGGGAGCGCTGAGTCTCGGGTGCCGAAGGGACCTCAGATGATT  
CCTACAGGGCCTGTGCTTTCTTCCCCTGCTTAGAGAACAGCACATAGGTCTTAGCGGCT  
TGCACATAAAACATAAAATGAAAAGATCTTTAGCCCCATAAGAAAAGAAAAATAAAACAAAAA  
CCCTGAGCAGCCTGGTTTGGGATAAAAAACATGCAGTGTACATGATTTTTGTAAAAATTA  
CTTTGGCCAGAGCACTTGGGAAGCAAGCAGCATCTAAGCTGAGACAGGCAGTCATGCCTG  
AAAACCTGTCTAGTTGACAAGCATATGCAAATGAGGAAAGAGGGAGGCTCCCTGGTCTCT  
AGTCAGCAGCTAGGCTGACGGCCATGACAGGCTTCAAACCTGACAGTTAAGGAGACTAGG  
CCTAAACCTCTGTFTTCCAAGACCTGGGAAATTTCTTGGCGAGTCCAGGCCTGCCTCAGAAG  
GTGCCCCACCACCTGGCCTGAGGCAAGGACAATGGATGAGTCAGCTGCAGTTTTCCAGATC  
GACTCCCCCTAGCAAGTTTCCAGCCCCCTCACACCTCAGTAATGGAATGTCTATAGAGATG  
GACCCAACAGATTAACGTAGAGGTCACCTACCCAGAATTCCTAATGTGCTTTAAATCA  
GGCCTGTAAGCTCACTTGGTTGACTCTCTCTGTCTTGGTAATGGGAGAGCCAGCATGCT  
GGACTACAGAATAAAACACTCTTTGTGTCTATATACTATTCAAGTCCGGGCTTTCGTTCT  
TTGTGGAAATATGGACCCTTACAGTAGGAAGGAGGTAGCCTAGCATGGTGTGAGGTAAGT  
GGACAGAGCAAAGAGTCTTCCAGAGAAGAGGGTGAGAAGAGACTCTTGGCTCCATGAAAA  
AGCTAAAGCCAGCAAGAACATAAGGCGGGAACCTGAAACAGTGTGAGAGCTGTGAGCTGAT  
CTGTGGGGTTTCTGCCCTGGCTAGTGACGTAGCCCGGAGGAGTCTTGCCACCCATGCC  
TTCGGGTAGAGGAGGAGTAGGATTTGCAGAGCGTTCAGAGCTTCATCCTGGTACCAAGGC  
CCTTACCCACAGCTTTGCGGTGCTTGTGATATGTATGCCACAGTAAACCACAATCCAAAA  
GTATCAAATGGGAAACTCTAAAAATAAAATAACTCAAGAACTTGACATTGCGGCCTCTGTC  
AGGAACTCTGCTCCCATCAGCTCCCTCTGACTCCCGGATGGGAATTAATCCCTCGTGCAG  
TATAACCTCACCTGCCATCAGCGCTTACTTCGTTCCAGCCGTTTCAGCTCTCAGGCC  
TACTGTGGGGTTACAGTAATCTAGATCCACATTATGTTATGTTGTTGATCTTGAGTTGT  
GCTTAATTTTACTTATTAACCTTATTCTTACTATGGG

> Rat Chaer 2661 bp

CATTTGCAGGGGCCTCACGGAGTGCAGACTCGGTGTTACATCAGGCAGTTCTCCATAATC  
TGGTAGCCCATGTCTGACGCCAATTCTGGTTCTCTGAATCTGATAGGTGCAGATCCCCAA  
CTGATCTTGAACATGGTGTGGCAGGATCACCTAGCAGGCTGAAAGTCATGTGAAGAGAA  
GAGCGGAGGGTTTGTGTGCAAAGTCTCAGGATGGCTAACTTGTCTCCTTCCGAGGCTTCTA  
GAAATGGCTCTGACACAAAAGGCCTTTGGGAGAGCAGGCTCAAGTGACAAGAGACCCCTTCT  
CTCATTTGAGCCCATTCAGAGGGGGACACCCACAGGCAGGAACATGTGTGCCAGCCCTG  
ACCAGAGCAACAGTGAACAGTCACTGCTGTGTTTACAGCATCCATCCAGAAACACTTGT  
GGTTTTCCATCACATTTCTAGAATCCACAGGAGACCTGGAAGCTGACTCTTTCTCTTCTGT  
GATCTCCGCCTCCCCTGCTGGCCTGTGCTCTGTGGAACTCATTAGCTGAACCCTGGACA  
AGGACAAGCAAGCAGGGCTGAAAAGAGACTTTATGAACAACGTGGTCTGCTGTCTCCTT  
GTGAAGAAACCTGAACCTAGAAAAGCAGGGAGTTTGGCTTGTATTTGTTATTCCTGGAAG  
GATGTGTGTGTGTGTGTGTGTGTGTGTGTGTGTGTGTGTGTGTGTGTGTGTAGGGGGTAATAACAGCAT  
TTGTCACTTTTTACTGCTGCTGTGTGATAGTAGTCCCTGACCCCTTTCCAGGACTTCCATA  
ACTTGGCTCAGAGTTGGCCCTTAGATTGGCAAACCAAAGTTGGCACTGAGCAACACATAA  
GAAGTAGAAAGAATTTTTTCATGACTTCAGCAGCTCCAACAGACTCTGAAGGGAGAGAGG  
TACCAGTCTATTGCTTACCATCCAGTCCAGAGCAGCAGGGTCTTAGACCTGCATCTC  
AAGCCAGGTAGCTGCACATCAGACTCACACAGGATATGGGATCTCCATCTTGGGAGAAC  
AGCATTGATGCTTCAGCTCTGGCCTAGTCATTGCCAATGTCCATTGACGGTTCATCTTCA  
CTCTGAGGGGAGCAGAAAAAGGGGGTCTCATTTCGGATGCTAAGAGATGACAAAATTTCTA  
GAACCTTCTCTCTCTCTCTGTCAATTCAGCTTGATGAGCAATTAGCAGTCAGAAGCAGA  
CGACTCTACTCAGACAAGTTCCAGAAGGTGAGAGCCGGGTCTTGATGCCAAAGGAACCT  
CAGACGATTCCTGCCGGGCTGCGTTTTCTTCCCTTGCTTAGATAACAGCACATGGGTCC  
TTAGGAGCTTGACATAAAAAATAAATGAAAGATTTTTGTTTACCCCTCATCTATCTTTAGC  
CCCATAGGAAAAGAAAAAACAAAGCAAAACAAAATAGGCCTGGGCAGTCTGGTTTGGAAATAA  
AAACACAAGCGGTGTACACGATTTTTGTAAAAAATAACTTTGGCTAAAAGCATTTCCGGAAG  
TCAGCAGCATCTAAGCTTAGTCAGGCAGATTCATGGGTGAAAGCCTGTGTAGTTGACAAG  
CGTTTGCAGATGAGAAAAAGAGAGAAGTCTCTGTAGTCCTAGTGAGAAAGCCTTGGCTGACT  
CCATGACAGGCTTCAAACCTGGCAGTTCAGGAGACTAGGCCTAAATCTCTTTTTTCCAAGAA  
CTGGACAATTCAGGCTAGTTTCAGGCCCTCAGAAGCTTCCCTGCCATCTGGCCTGAGGCAA  
GGACAATGGGGTCAGCAGCCATTTCCAGACTTCCTCAGCTACTTCCTCAGCGGCAGTTTC  
CAGACCTCCCCAGCAAGTTTCCAGCCCCCACACTTCAGTAATGGATGTCGGTAGAGATGG  
ACCCAACAGATTAACATAGACGTCACTACCCCTGGAATTCCCTAACGTGCTTTAATTCAG  
GCCTGCAAGCTCTCTTGGTACTCTCTATTCTGGTAAACGGGAAAACCGCAGCACGCTGGAC  
TTCTACAGAATAAAAAACTTTGTGGTTATATACTATTTAAGTCCGGGTATCATTTCTCAG  
TGAATCATGGACCCTTACACTAGGAAGGAGATATCCAGCACAGTGTAAGGTATTGGAAC  
AGAACAGAGTCTCCAGAGAGGAGGGCCAGAAGAGACTCCTGGCTCCATGAAAAAACTAA  
AGATGGCAAGAACAAGGCAGGAACTTGGACAGTATCAGAGCTGCGAGCTGTTCTGAAG  
GGTTTCTGCCCTGGTACTGACATAGCCTACAGGAGTTCTTCCACCTATGCCTTTGAGT  
AGAGGAGGTGTAGGATCTGCAGAACATCCAGAGCTTGTTCTGGAACAAAAGCTCTAACC  
CACAGCTGTGTGGTGTGCTTCAGTTATGTACCCACAGTAAACCACAGTCCAAAAGTATTAA  
ATGGAAAACTCTAAAAATAAAATAACCCATGGTCTTTAAATTTGCAGCCTGTGTTCGGAACT  
CTGGTCCCATCAGCTCCCTCTGGCCCCGTCATGTGAACTGTTCCCTCAAGCAGTCTACCC  
CATCCCTGCACATTAGCCCTGGTTTTCTTCCAGCCATTTCACTCTCAGGCCCGCTGTGG  
TGGCACAGTAATTTAGATCTACATTAAGTTTATGTTGTTGGTCTTGAGCTGGGCTTAATTT  
TATGAATTAACCTTATTTCTTA

> Human Chaer

1787 bp

AACTAAATCAAATGGAAACACTTCAGCTATGACAGGAACTACACTCGTCATTTACATAGA  
ATGTACACCAAATACATAACTTTGTAACCTCACTTTAGCCTCTTCATTTACATAGGGCGT  
ACACCAAGTAACCAATGGAAACCTCTAGATGGTATTTAAACCCAGAAAATTCGTGTAACC  
GGGCTCTTAA GCCCCTATGCTCAGCCGCTCCCACCCTGTGGAGTGTACTTTTGT TTTCTA  
TAAATCTCTGCTTTTGTGCTTCATTCTTTCCCTTGGTTTTGTTTTGTGTGTTTTGTCCAATT  
CTTCGTTCAAGATGCCAAGAACCTGGACACCCCCAACTGGTAACATATGTAGGGCAATTC  
CTCTTAATATGACTCTCCTACTGGTTCAGTTTCTCTGGTTGAACCCTGACTGATACATCC  
TGAATAAGTTTGAATGTGGAGCTGACCGGCTAAGCTAGTGTATTGGAAGTGGGATGTGAG  
AAAGTGGAGTCCAGGATGATGCCAAAGTTTTTGTCCCGAGCAGCCAGAAGGATGGCTTAG  
GTATCTCCTTCTAAGGTAGGAATCACGAATGCAAAAAGCCACCTACAAAAGCCTGTTCAAG  
GGATGGCAAAGGAAGATGCCCAGTTTCCCCAAGGAAGCCCTTTCAGACGGGGGATGTGT  
ATAGGCAGGAATGGGTGGAGTGGCTGGCCAGCCCTGATGTGGGCAAGCTCCAATTTAAG  
GGGGTGAAAATAGGTAATAAAGTCACTGCTGTGCTCCATGCCACTCATCCAGAAAACACTAG  
TGGTTTTCCAGTGCATTCTGGAAATCCTCAGGAAATCTGGAGATCTTTTTACTGTTCTCTG  
CTGTGAACCCACCTCCCCTGCTGCTGTGTGCTCTGGGAATGAGTTAGCTGAACCCTGAG  
CCAAAAACCAACAAGGAGTGTGAATAGAGACTTTATGGAGTTGCTCTGTGGGCTTTTTT  
TCTTGTGAAGGAACAGGGTGTGCTTGAAAGTAAAAAGTGAGTTATTTGGTGTGTGTTGTTG  
TTGTTATTGTTGTTTAAATCTTCTGGAAGGCAGAAAAGAAAGAGATAAAAAGGAAAAAAC  
AGCATTGTCACTTATAGTGTCTGTTAGCACAGTAGCTGGGCCCTGAACCCTCTACA  
GGCCTCCCAAGCTGGCACTGAATAAAATGTGAGAAATGAAAGGAACCTTTCCGTGAGTCT  
GGCAGCGCCGACAGACACTGAGGTGGCAGAGCTGTCTGGTCCCAGTCCACATGCAGAGGC  
CTGCAGCTCCTCCTTCCAGCCCGCACCCACCAGAGCTTCTCAGACGGGCCGTGTCTGAG  
AAGGTTGTTGCCAATGTAGATGTTTTGAGAGGCTCACTGATGAACAAAATCAACAGAGCAGA  
TTTAATCTGAAGAGATCCAAATATTGTGCTTCTTTGGACTCATAGAAATGGCGAAAAGATT  
TAACATCAGGAAGTACTTAAGTCAGCTAATTTCTAGAGCCTTCTTCTCCTGTCACCTG  
ATTCTAGATAGGATCACCAGTTAGACATCAGAACCAGATCTTTTTATCCAGAGAAGTACC  
AGTTTGTGTTTTTCTTCCGAAGCCAAGTCTCGAGTTTCAGGTAGACTTCAGTTGATT  
TCTGCGAGGTCTTTGCTTCTCTCTGCCAGAATAATCACTGCTGAGGTAAGTGCAGACAA  
GGTCTTAGCACCTTAGATCAGTATAGGAAAGAAAATGAAAAATGTTTGTCTCACCTCTT  
TTTGCTGCTGATCTCTACAGGAAAGCAAAAAGCCCCGAAGAGCCTGGC
