# Supplementary material
Source: PubMed Central journal article supplement (PMC5053883)
Supplement: NIHMS808830-supplement-3.pdf [file NIHMS808830-supplement-3.pdf]

### Alignment of rat and mouse *Chaer* homologs:

| Score                      | Expect | Identities                                                      | Gaps         | Strand    |
|----------------------------|--------|-----------------------------------------------------------------|--------------|-----------|
| 2425 bits(2688)            | 0.0    | 2184/2731(80%)                                                  | 177/2731(6%) | Plus/Plus |
| Query = rat <i>Chaer</i>   |        |                                                                 |              |           |
| Sbjct = mouse <i>Chaer</i> |        |                                                                 |              |           |
| Query                      | 1      | CATTTGCAGGGCCTCACGGAGTGCAGACTCGGTGTTACATCAGGCAGTTCTCCATAATC     |              | 60        |
| Sbjct                      | 107    | CATTTACTGGGGCCTCACGGAGTGCAGACTCGGTATTCCATCGGGCAGTTCTCGGTAATC    |              | 166       |
| Query                      | 61     | TGGTAGCCCATGTCTGACGCCAATTCTGGTTCTCTG----AATCTGATAGGTGCAGATCC    |              | 116       |
| Sbjct                      | 167    | TGGTAACACGTGTCGGATGCCAGTTCAGTTCCTGGTTGAATCTGATAGGTACAGATCC      |              | 226       |
| Query                      | 117    | CAAACCTGATCTTGAACATGGTGTGGGCAGGATCACCTAGCAGGC-TGAAAGTCATGTGAA   |              | 175       |
| Sbjct                      | 227    | CAAACCCATGTTGGACATGGTGTGGGCAGGATAACCTGGCAGGCCTGGGAGTCAAATGAA    |              | 286       |
| Query                      | 176    | GAGAAGAGCGGAGGGTTTGTTCAAA-GTCTCAGGATGGCTAACTTGTCTCCTTCCGAGG     |              | 234       |
| Sbjct                      | 287    | GAGAGGAGCTGAGGGCT-GCTGCAAAAGTCTCAGGATGGCTGACTTGTCTCCTTCTGAAG    |              | 345       |
| Query                      | 235    | CTTCTAGAAATGGCTCTGACACAAAGGCCTTTGGGAGAGCAGGCTCAAGTGACAAGAGA-    |              | 293       |
| Sbjct                      | 346    | TTTCTAGACTTGACTCTGACACAAAGGCCTTTGGGAGAACAGACTCAAGGGACAAGGGGT    |              | 405       |
| Query                      | 294    | -----CCCTTCTCTCATTTGAGCCCCATTTCAGAGGGGGACACCCACAGGCAGGAACAT     |              | 346       |
| Sbjct                      | 406    | GATGCTTCGCTTCCTCATTTGAGCCCCTTTCAGAGGGGAAAACCTCACAGGCAGGAACCT    |              | 465       |
| Query                      | 347    | GTGTGCCAGCCCTGACC-AGAGCAACAGTGAACAGTCACTGCTGTGTTTGACAGCATCCA    |              | 405       |
| Sbjct                      | 466    | GCGTGCCAGCCCTGACCCAGAGCAACAGTGAACAGTCCCCGCTGTGTTCCACAGCGCTCA    |              | 525       |
| Query                      | 406    | TCCAGAAACACTTGTGGTTTTCCATCACATTTCTAGAATCCACAGGAGACCTGGAAGCTGA   |              | 465       |
| Sbjct                      | 526    | TCCAGAAACACTGCGGGGTTTTCCATCACATTTCTGAGTCCACAGGAAACCTGGAAGCTGA   |              | 585       |
| Query                      | 466    | CTCTTTCTCTTCTGTGATCTCCGCTCCCCTGCTGGCCTGTGCTCTGTGGAACTCATT       |              | 525       |
| Sbjct                      | 586    | GTCTTTTTCTTCTGTGATCTCTGCCTCCCCTGCTGGCCTGTGCTCTATGGGAGCTCATT     |              | 645       |
| Query                      | 526    | GCTGAACCCCT-GGAC-AAGGACAAGCAAGCAGGGCTGAAAAGAGACTTTATGAACAACCTG  |              | 583       |
| Sbjct                      | 646    | GCTGAACCCCAAGGACAAGCAAGCAGGGCTGAATAGAGACTTTATGAACAGCTG          |              | 705       |
| Query                      | 584    | -TGGTC-----TGCTGTCTCCTTGTGAAGAAA-----CCTG-AACTAGAAAGCAGGG       |              | 628       |
| Sbjct                      | 706    | CTACTCCGTGGTGTGTCTCCTTGTGAAGAAAGGGGTGAGCCTGGAAGTAGAAAGCAGGG     |              | 765       |
| Query                      | 629    | AGTTTGGCTTTGTTATTGT----TATTCCTGGAAGGGAatgtgtgtgtgtgtgtgtgtgtgt  |              | 684       |
| Sbjct                      | 766    | GATTTGGTTTTGTTATTGCGTAATCTTCTTGGGAGGCGGGG-----                  |              | 811       |
| Query                      | 685    | tgtgtgtgtgtgtgtgtgtgtAGGGGGGTAATAACAGCATTGTCACTTTTACTGCCTGGTTGT |              | 744       |
| Sbjct                      | 812    | -----GGGTGTAAGAAGAGCATTGTCACTTGAAGTGTCTGCTTGG                   |              | 853       |
| Query                      | 745    | GATAGTAGTCCCTGACCCCTTCCAGGACTTCATAACTTGGCTCAGAGTTGGCCCTTAG      |              | 804       |

|       |      |                                                                |      |
|-------|------|----------------------------------------------------------------|------|
| Sbjct | 854  | GACAGTATTCCTGACCCCTTTCAGGACTTCCATAACTTGGCACTGAGTTGGCCCTTAA     | 913  |
| Query | 805  | ATTGGCAAACCAAAGTTGGCACTGAGCAACACATAAGAAGTAGAAAAGATTTTTTCATGA   | 864  |
|       |      |                                                                |      |
| Sbjct | 914  | GTTGGCAAACAAACCTTGGCACTGAGCAACACTTAAGAGGTAGAAAAGATGTTTTTCATGC  | 973  |
| Query | 865  | CTTCAGCAGCTCCAACAGACTCTGAAGGGAGAGAGGTACCAGTCTTATTGCTTACCATCC   | 924  |
|       |      |                                                                |      |
| Sbjct | 974  | CTTCAGCAGCTCCAGCAGACTCTGAAGGCTGAGCGGTAGCAGTTCTATCGCCTGCCATCC   | 1033 |
| Query | 925  | AGTCCCAGAGCAGCAGGGTCCTTAGACCTGCATCTCAAGCCAGGTAGCCTGCACATCAGA   | 984  |
|       |      |                                                                |      |
| Sbjct | 1034 | AGCCCCAGAGTAGAAGGGTCCG-----GCATCTCCAGCCAGGTAGCCTGTATGTTCAGG    | 1086 |
| Query | 985  | CTCACACAGGATATG----GGATCTCCATCTTGGGAGAACA-GCATTGATGCTTCAGCTC   | 1039 |
|       |      |                                                                |      |
| Sbjct | 1087 | CTCACATAGGCTATGTATGGCATCTCCATCTCGGGAGAACAAGCGTTGATGCTTCAGTTC   | 1146 |
| Query | 1040 | TGGCCTAGTCATTGCCAATGTCCATTGACGGTTCATCTTCACTCTGAGGGGAGCAGAAAA   | 1099 |
|       |      |                                                                |      |
| Sbjct | 1147 | TGGCCTCGTCATTACCAATGTCCCTTCAATGGTCCCTCTTTACTCTGAGGGGAGCAGAAAA  | 1206 |
| Query | 1100 | AGGGGGTCTCATTTCGGATGCTAAGAGATGA-CAAATTTCTAGAACCTTCTCTCTTCT     | 1158 |
|       |      |                                                                |      |
| Sbjct | 1207 | --GGGGTCTCATTGATGCCATGAGATAAGCTAATTTCTAGAACCTTCTCTATCTTCT      | 1264 |
| Query | 1159 | GTCAATTCTAGCTTGGATGAGCAATTAGCAGTCAGAAGCAGACG----ACTCTACTCAGA   | 1214 |
|       |      |                                                                |      |
| Sbjct | 1265 | GTCAGTTCTAGTTTGGATTAGCGATTAGCTGTCAGAACCAGACAGACAACCTCTACTCAGA  | 1324 |
| Query | 1215 | CAAGTTCAGAAGGTGAGAGCCGGTCCCTTGA-TGCCAAAGGAACCTCAGACGATTCCTG    | 1273 |
|       |      |                                                                |      |
| Sbjct | 1325 | CAAGTACCAGATGGGAGCGCTGAGTCCTCGGGTGCCGAAGGGACCTCAGATGATTCTTA    | 1384 |
| Query | 1274 | CCGGTCTGCGTTTCCTTCCCTTGTCTTAGATAACAGCACATGGGTCCCTTAGGAGCTTGCA  | 1333 |
|       |      |                                                                |      |
| Sbjct | 1385 | CAGGGCCTGTGCTTTCTTCCCTGCTTAGAGAACAGCACATAGGTCCCTTAGCGGCTTGCA   | 1444 |
| Query | 1334 | CATAAAAATAAATGAAAGATTTTGTGTTACCCTCATCTATCTTTAGCCCCATAGGAAAGa   | 1393 |
|       |      |                                                                |      |
| Sbjct | 1445 | CATAAACATAAATGAAAGAT-----CTTAGCCCCATAAGAAAGA                   | 1484 |
| Query | 1394 | aaaaaaCAAGCAAACAAAATAGGCCTGGGCAGTCTGGTTTGGGAATAAAAACACAAGCGGT  | 1453 |
|       |      |                                                                |      |
| Sbjct | 1485 | AAAAAT----AAACAAAAAAC-CCTGAGCAGCCTGGTTTGGGATAAAAACAT--GCAGT    | 1536 |
| Query | 1454 | GTACACGATTTTGTAAAAATTAACCTTGGCTAAAGCATTTGGAAGTCAGCAGCATCTA     | 1513 |
|       |      |                                                                |      |
| Sbjct | 1537 | GTACATGATTTTGTAAAAATTAACCTTGGCCAGAGCACTTGGGAAGCAAGCAGCATCTA    | 1596 |
| Query | 1514 | AGCTTAGTCAGGCAGATTTCATGGGTGAAAGCCTGTGTAGTTGACAAGCGTTTCAGATGA   | 1573 |
|       |      |                                                                |      |
| Sbjct | 1597 | AGCTGAGACAGGCAG--TCATGCCTGAAAACCTGTCTAGTTGACAAGCATATGCAAATGA   | 1654 |
| Query | 1574 | GAAAAGAGAGAAGTCTCTGTAGTCCTAGTGAGAAGCCTTGGCTGACT-CCATGACAGGCT   | 1632 |
|       |      |                                                                |      |
| Sbjct | 1655 | GGAAAAGAGGGAGGCCTCCCTGGTCCTAGTCAGCAGGCTAGGCTGACGGCCATGACAGGCT  | 1714 |
| Query | 1633 | TCAAACCTGGCAGTTCAGGAGACTAGGCCTAAATCTCTTTTTTCCAAGAAGTGGACAATTCC | 1692 |
|       |      |                                                                |      |
| Sbjct | 1715 | TCAAACCTGACAGTTAAGGAGACTAGGCCTAAACCTCTGTTTCCAAGACCTGGGAAATTCT  | 1774 |
| Query | 1693 | AGGCTAGTTCAGGCCT----CAGAAGCTTCCCTGCCATCTGGCCTGAGGCAAGGACAATG   | 1748 |



```
Query 2632 GGCTTAA-TTTATGAATTAACTTATTCTTA 2661
          |||||  |||  |||||
Sbjct 2700 TGCTTAATTTTACTTATTAACTTATTCTTA 2730
```
